# Supplementary material
Source: PubMed Central journal article supplement (PMC3971836)

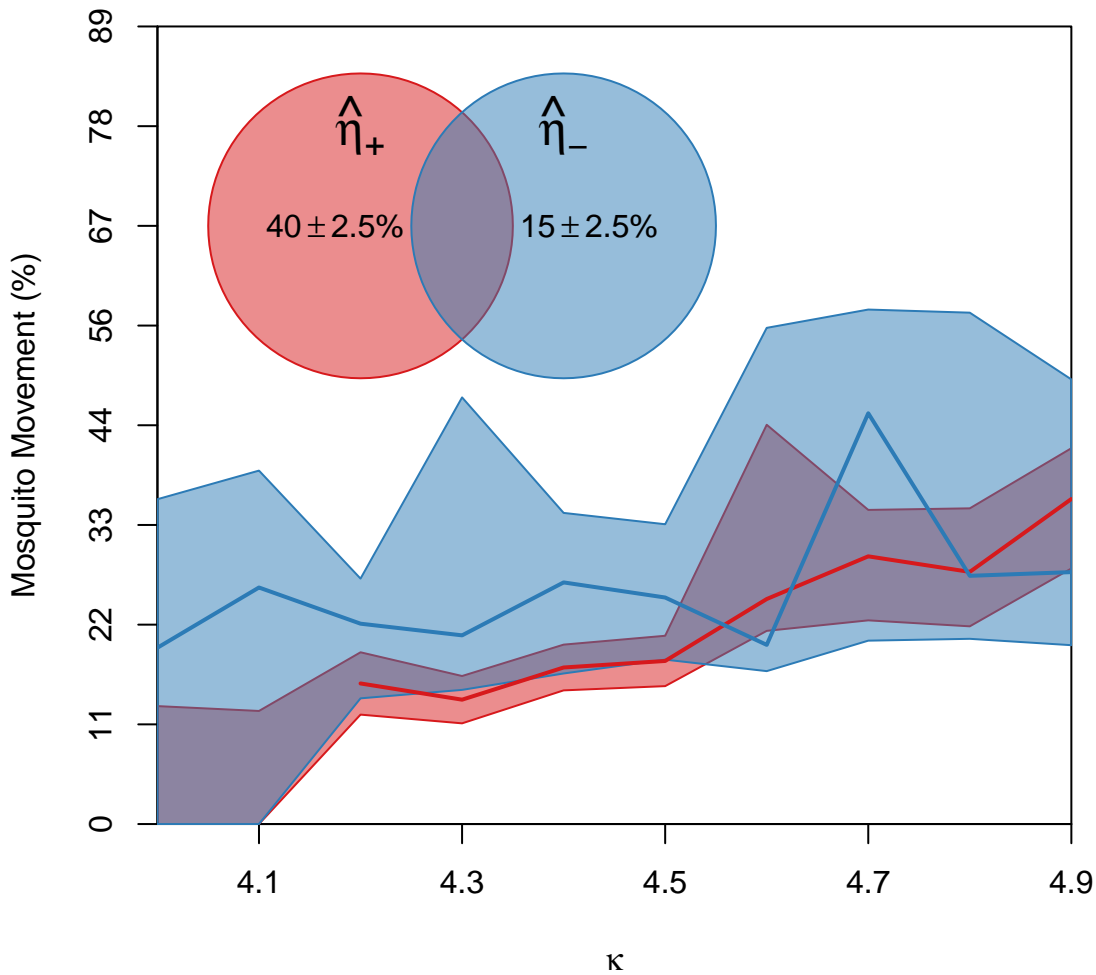

Supplement: NIHMS555593-supplement-10.pdf [file NIHMS555593-supplement-10.pdf]

K

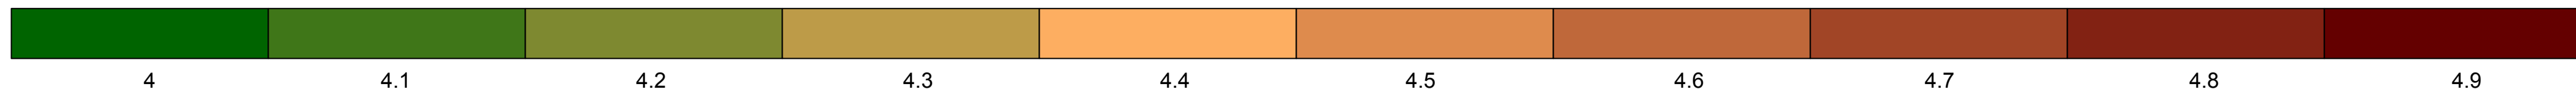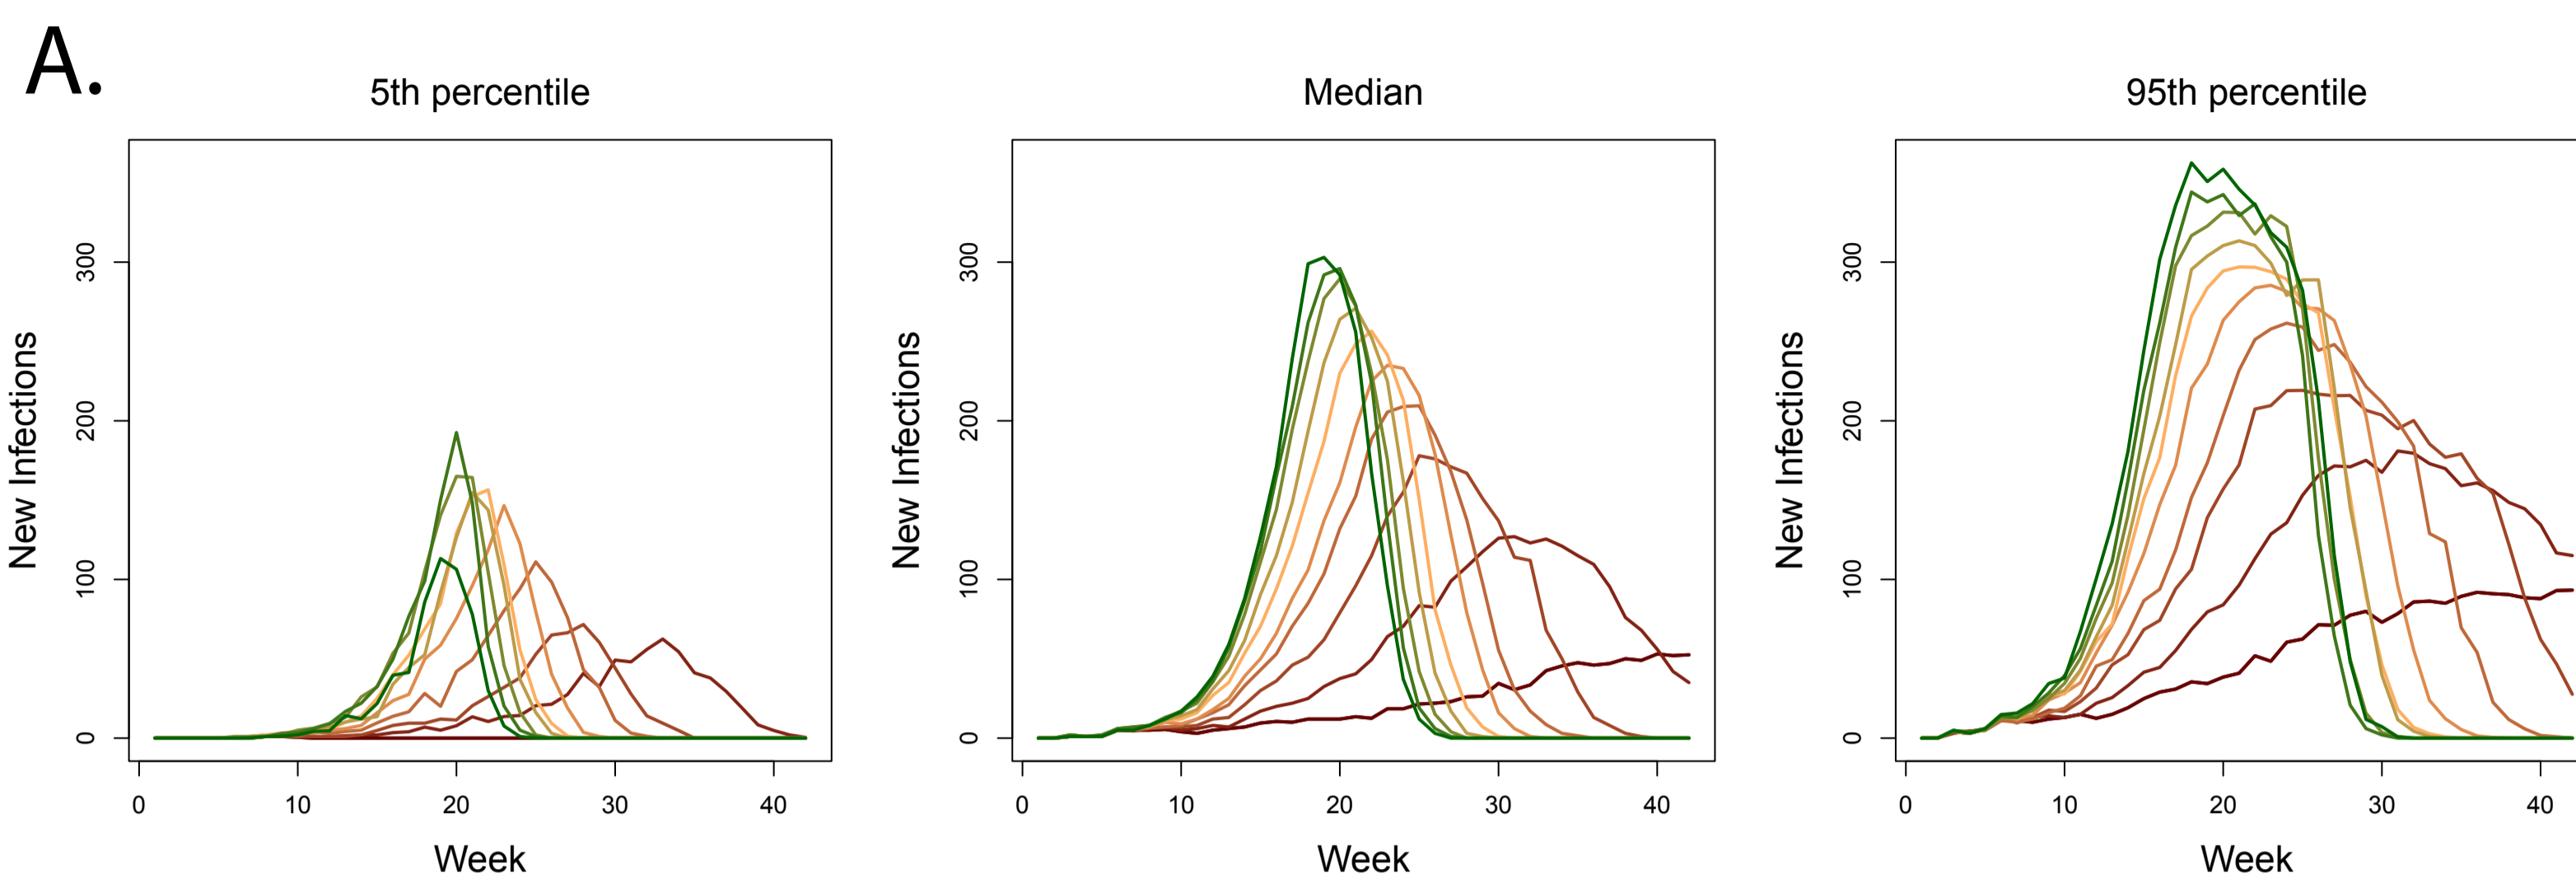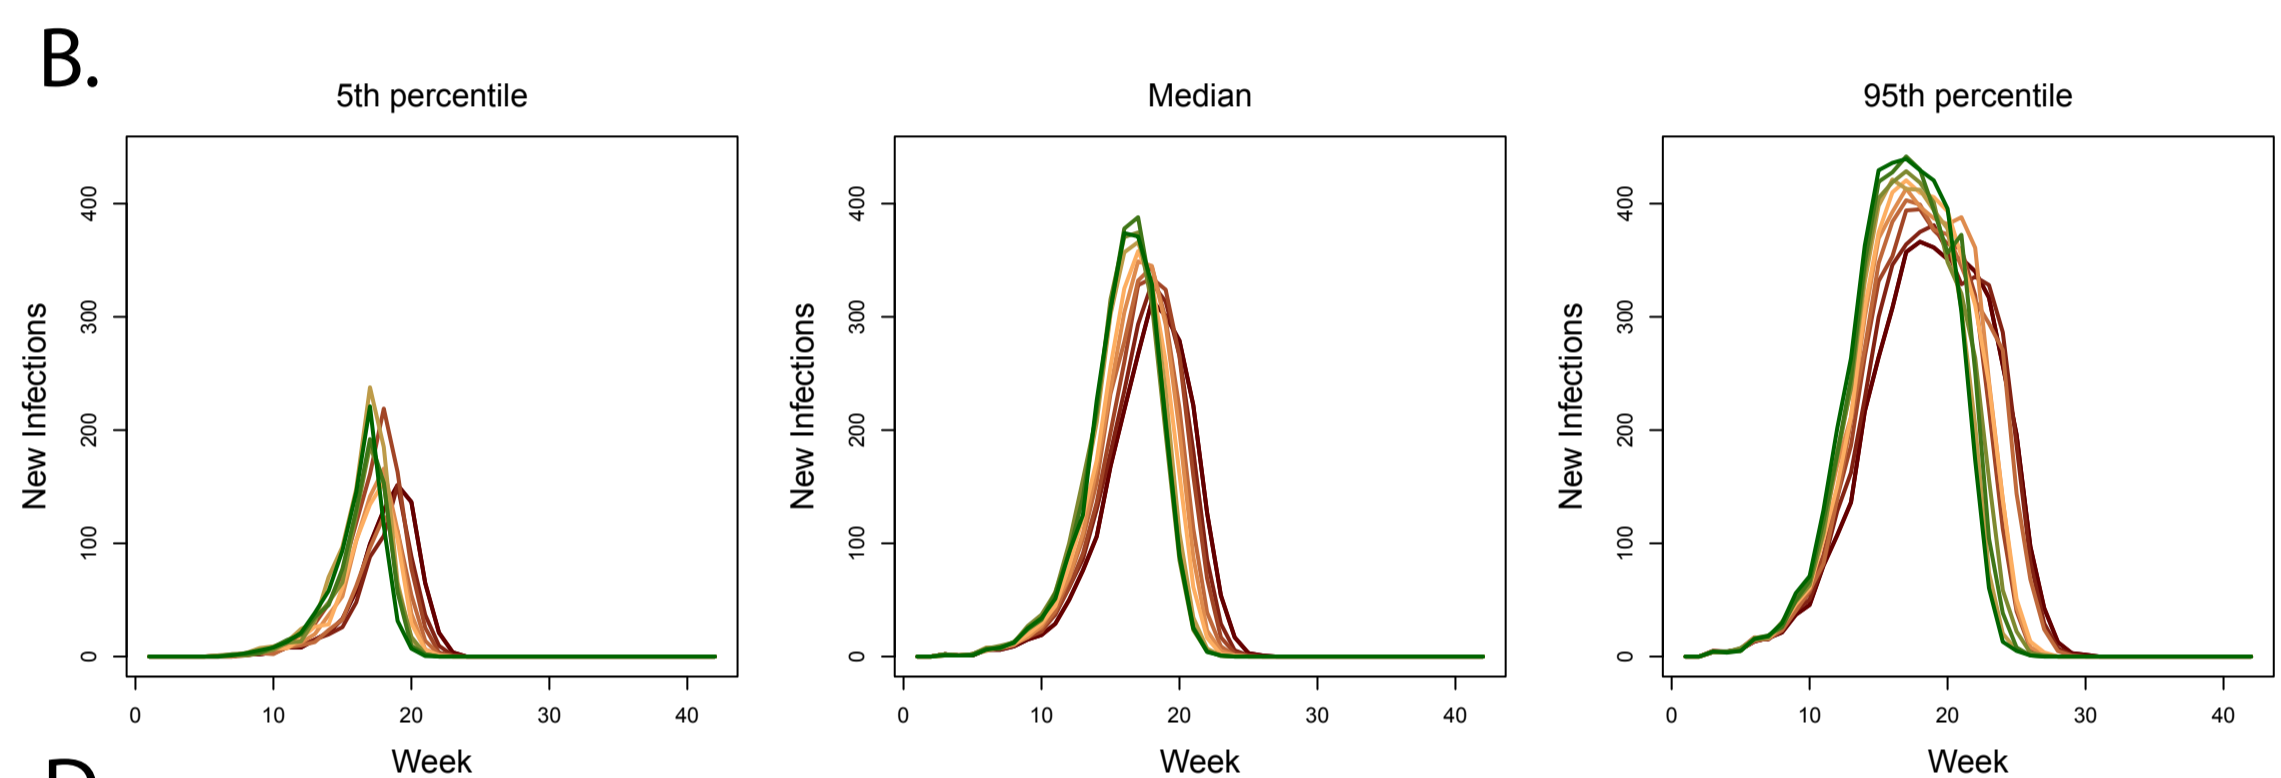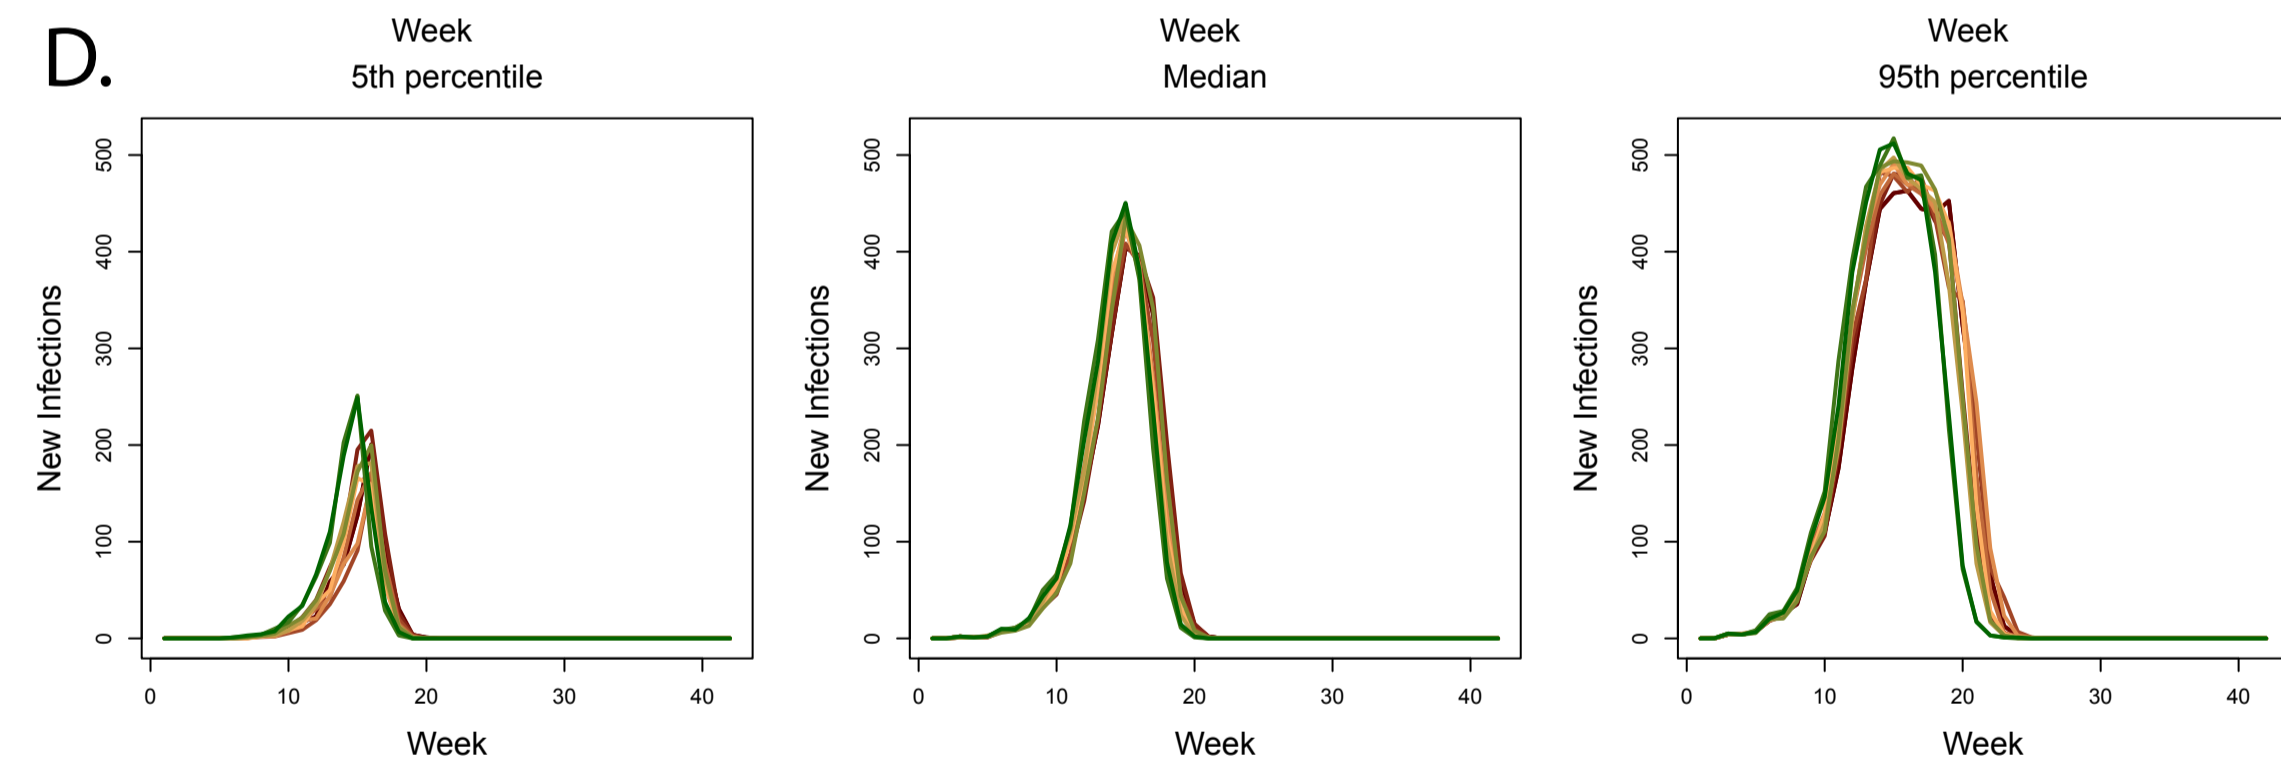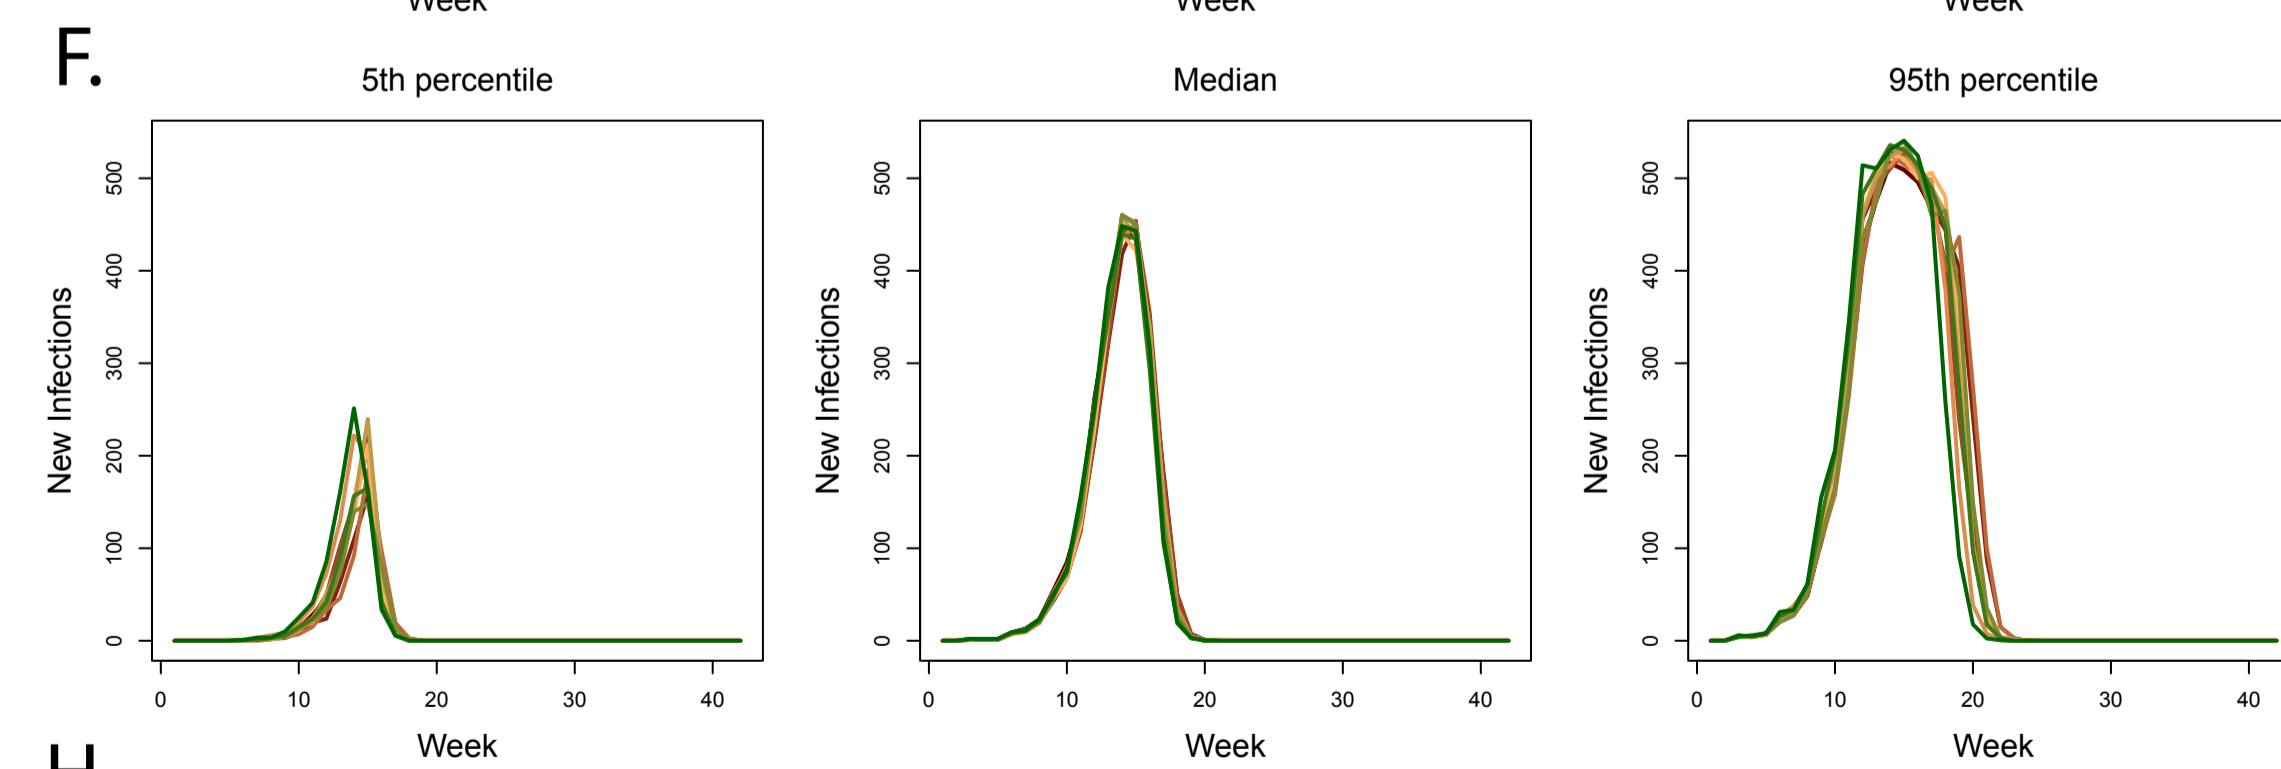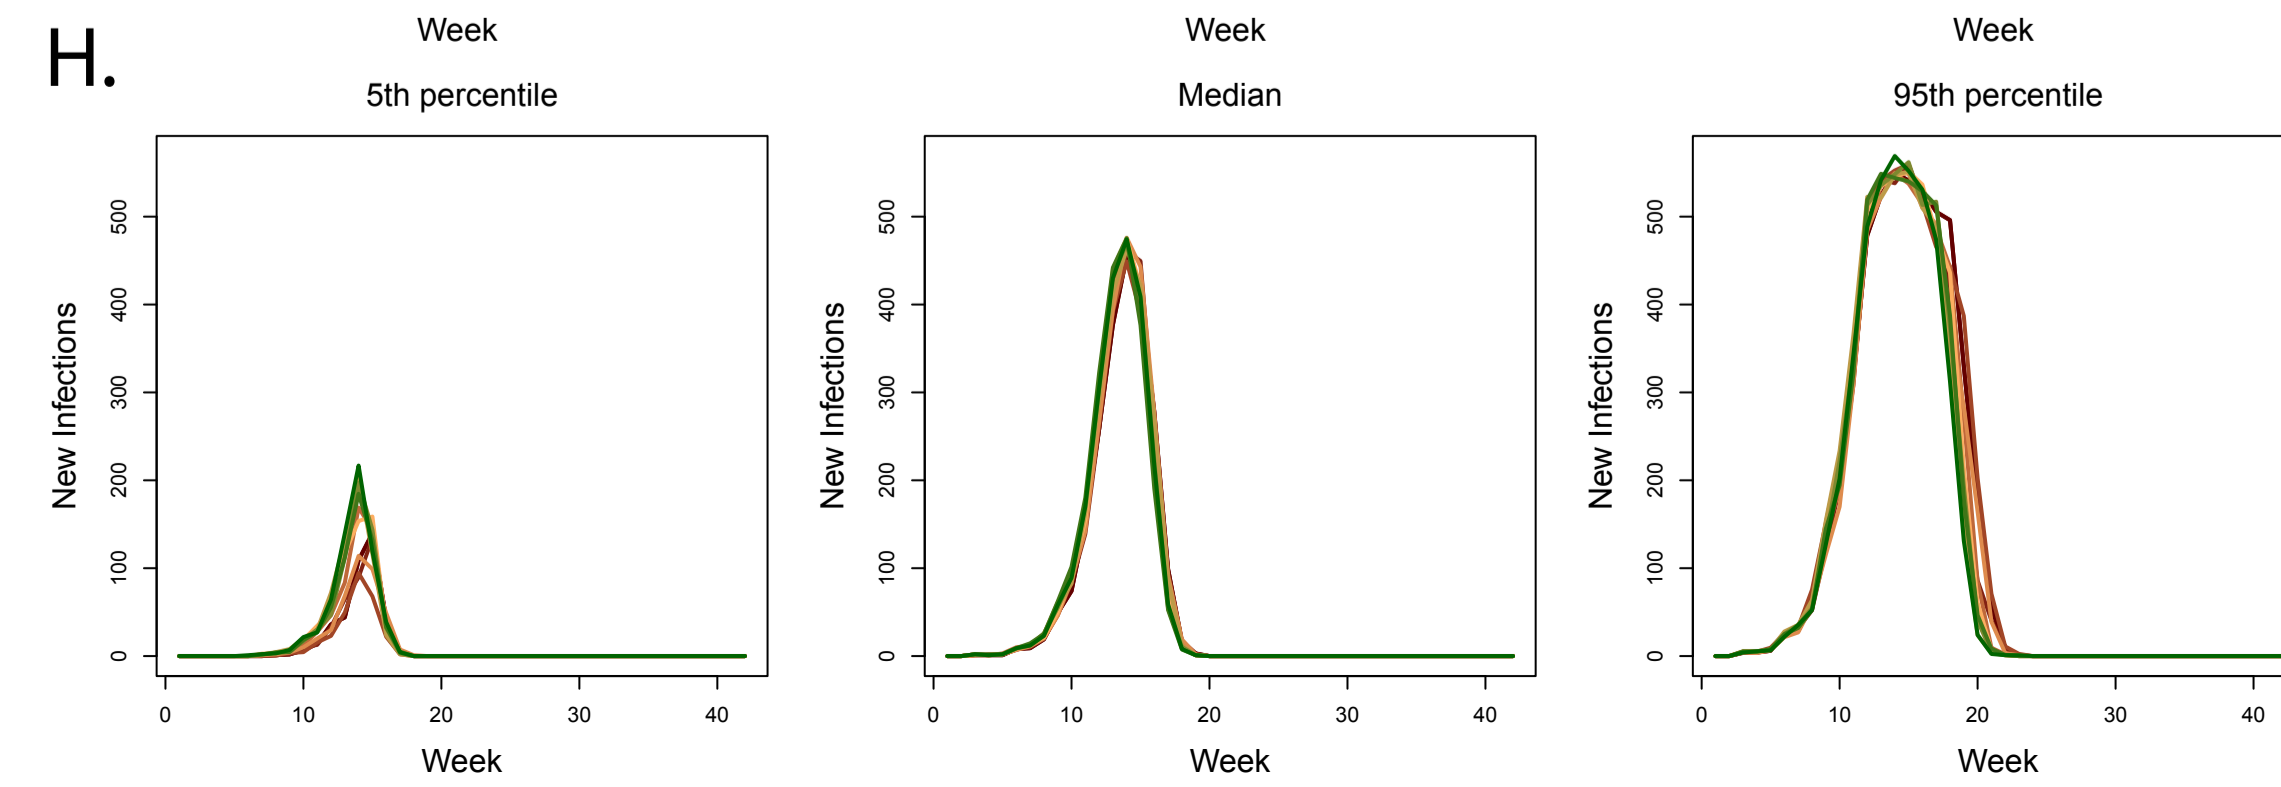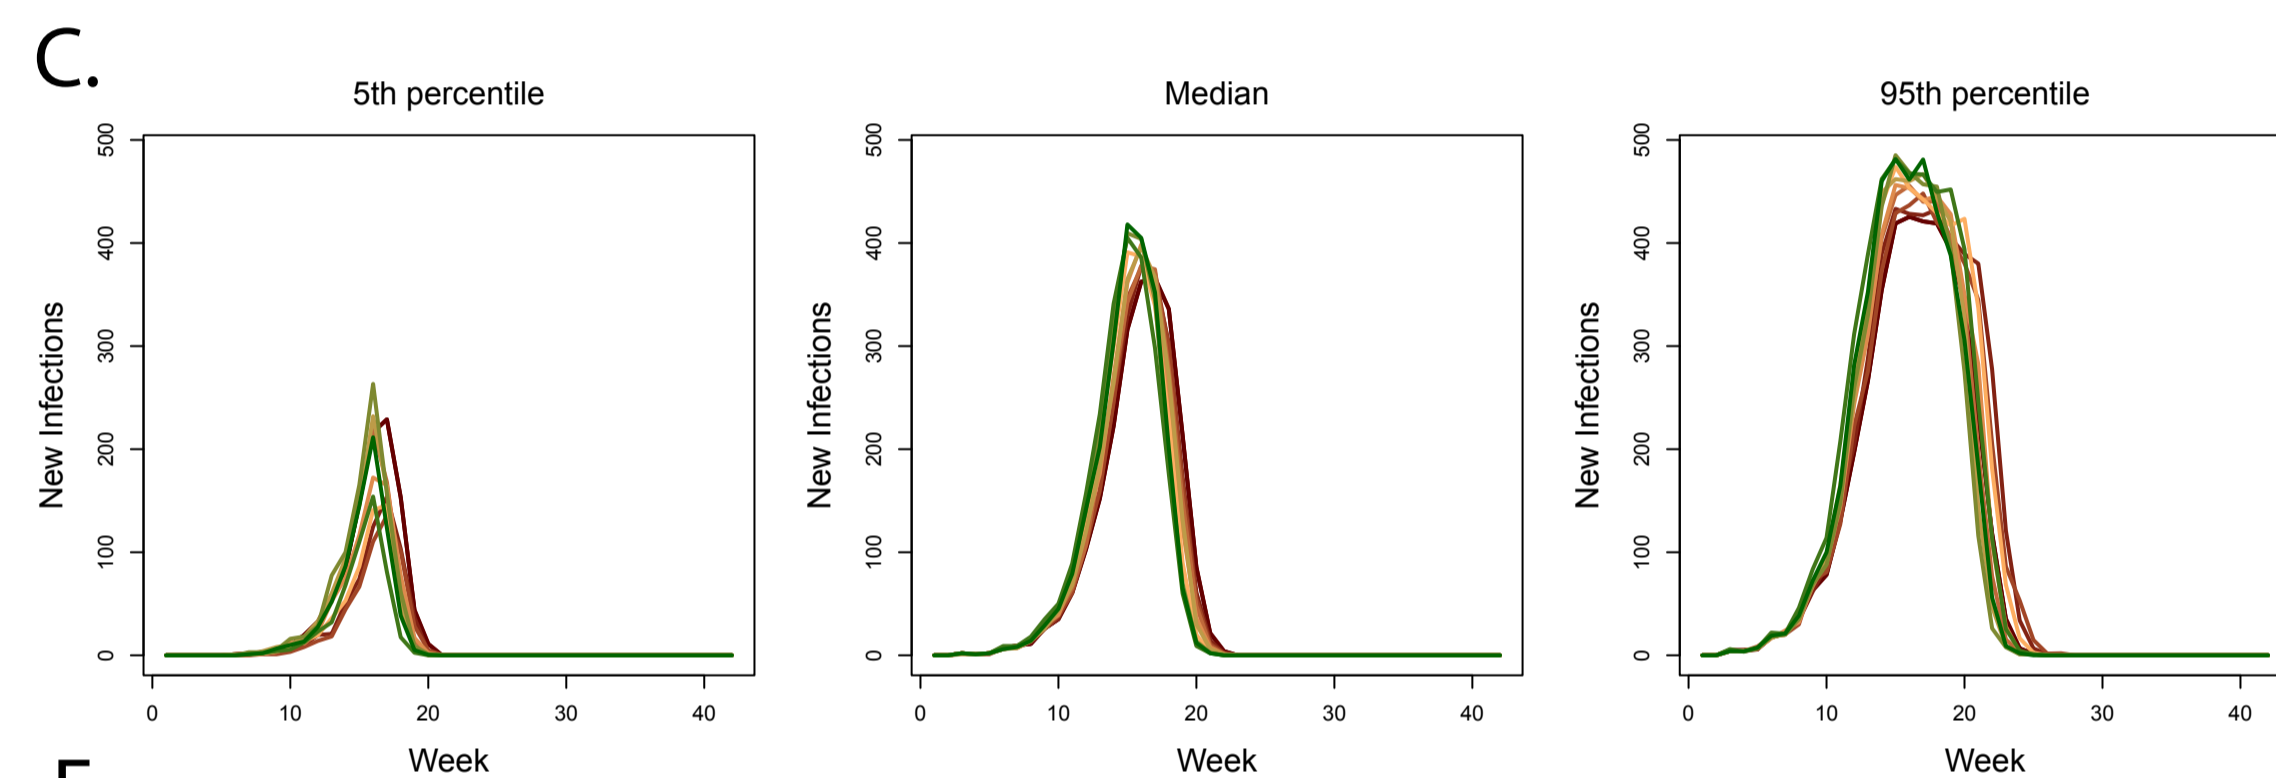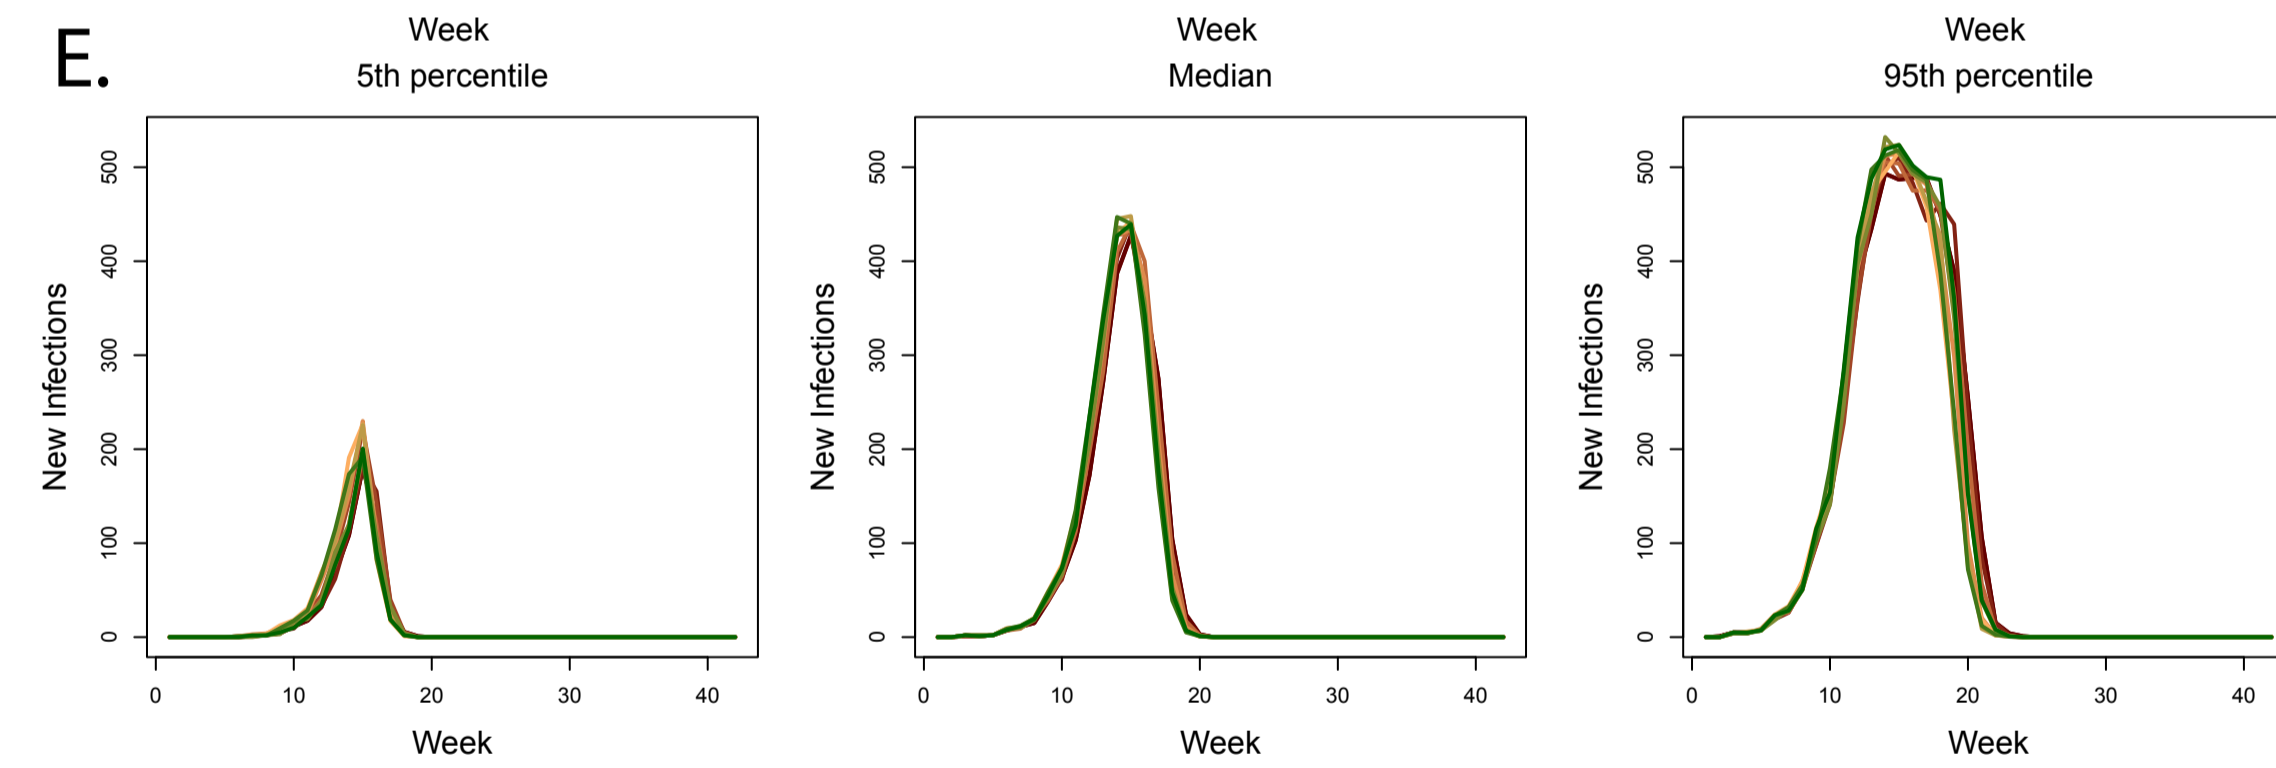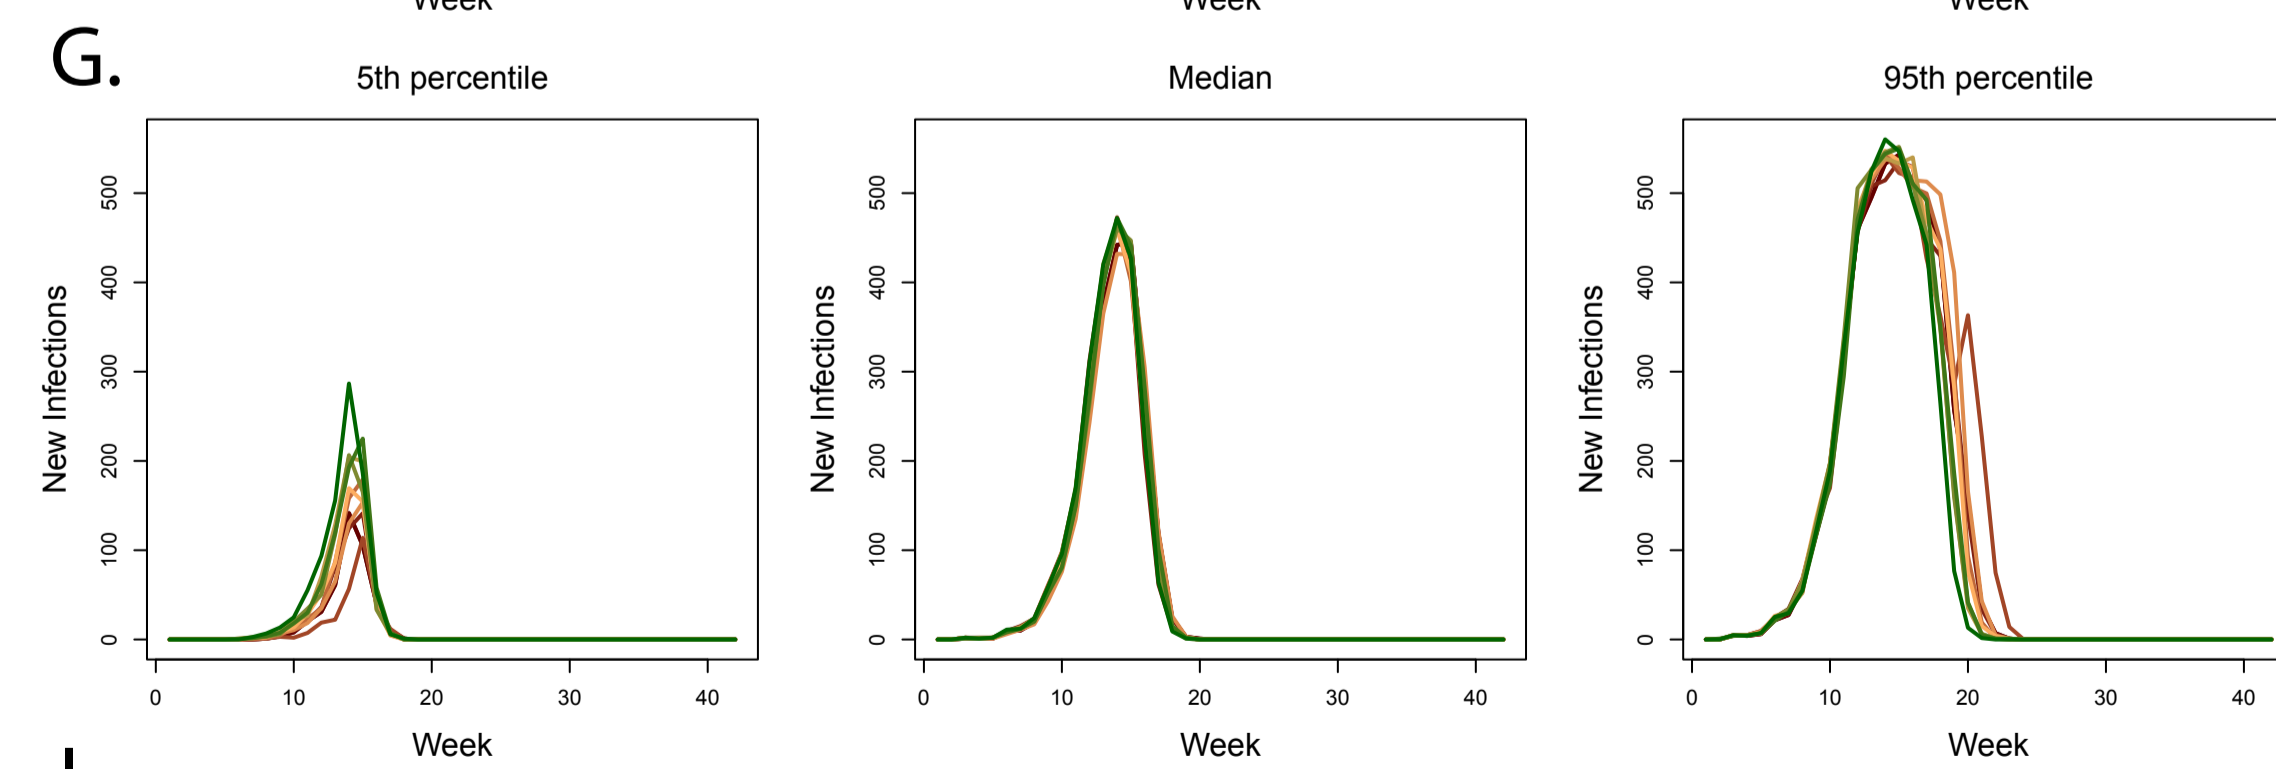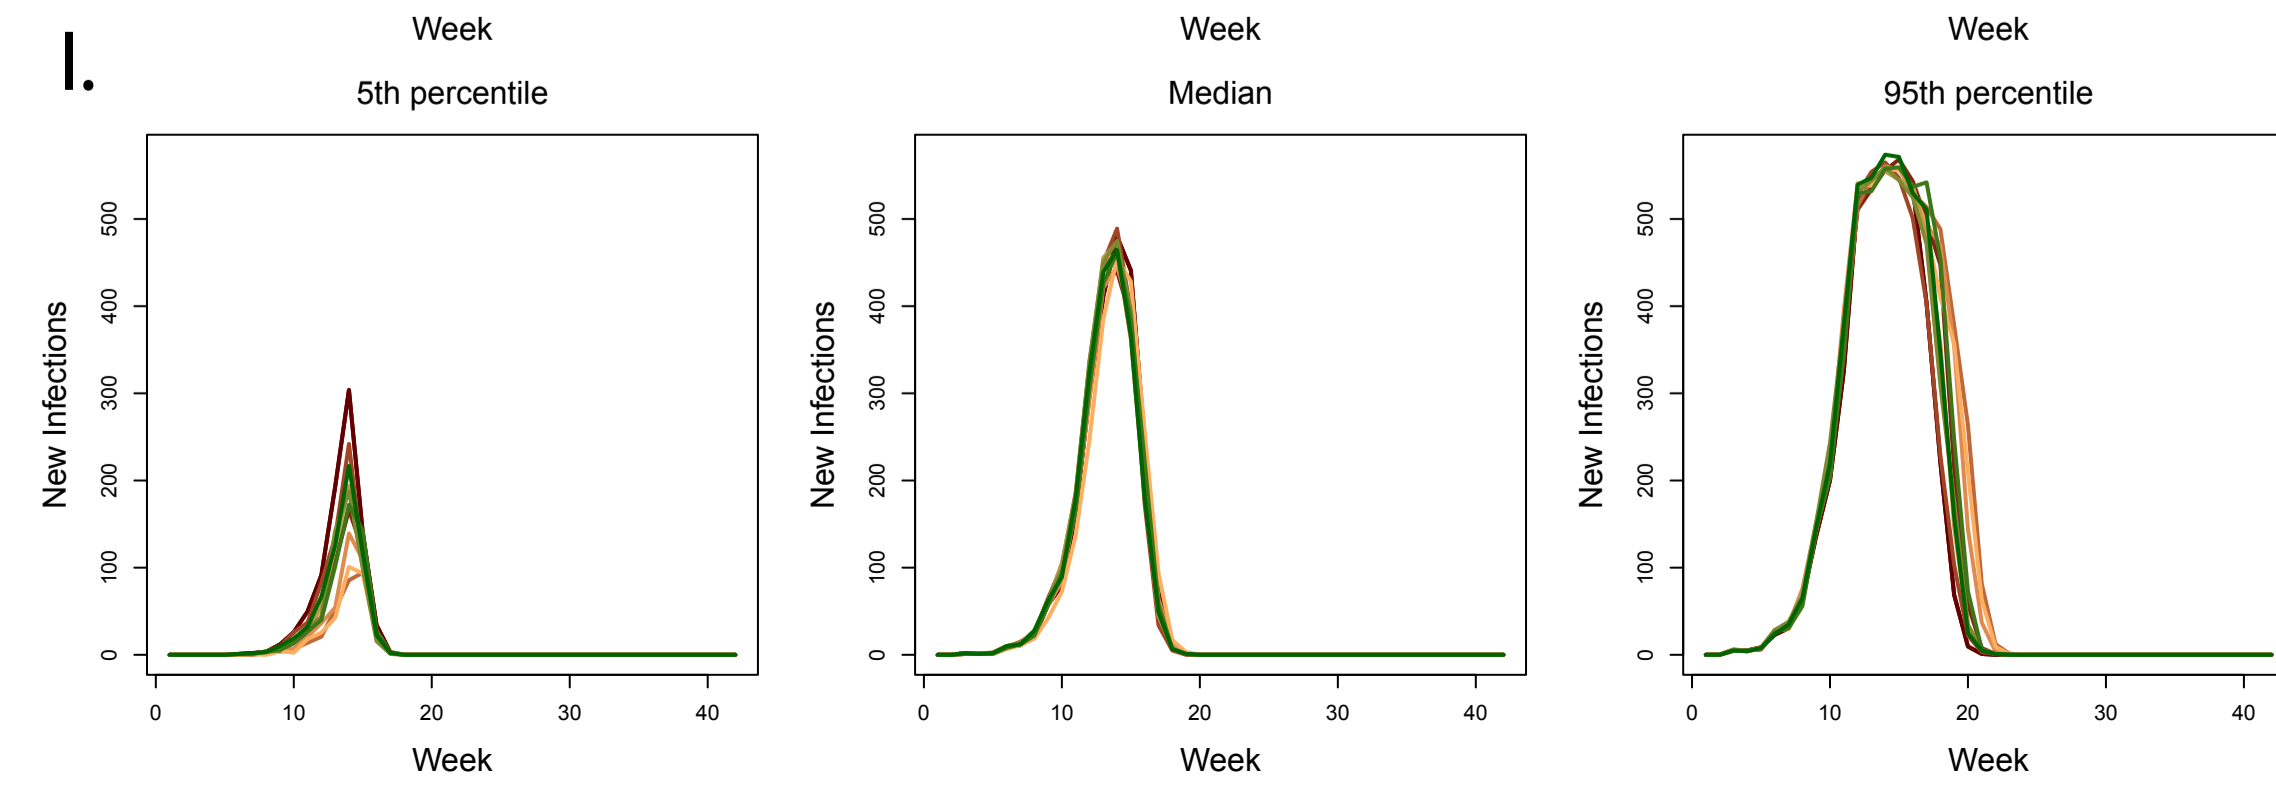

Supplement: NIHMS555593-supplement-11.pdf [file NIHMS555593-supplement-11.pdf]

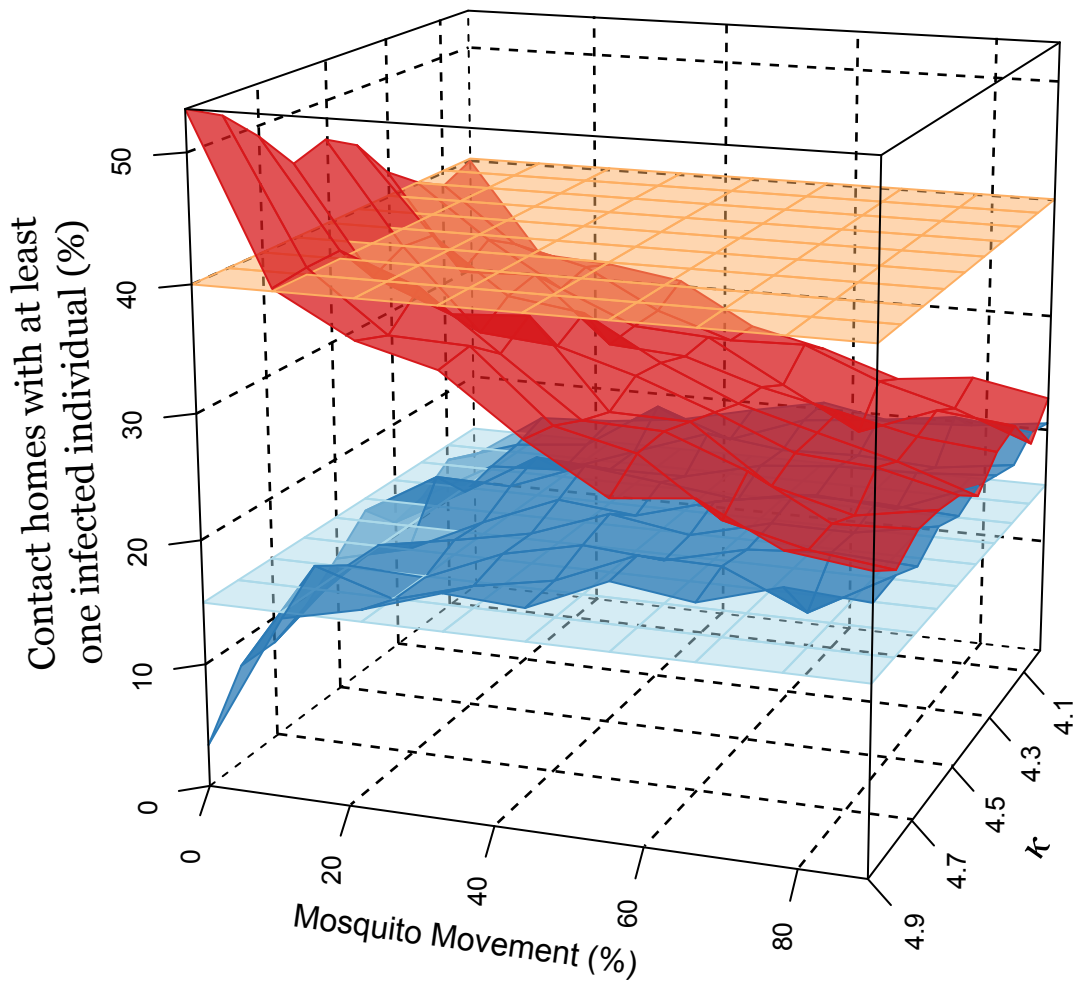

Supplement: NIHMS555593-supplement-12.pdf [file NIHMS555593-supplement-12.pdf]

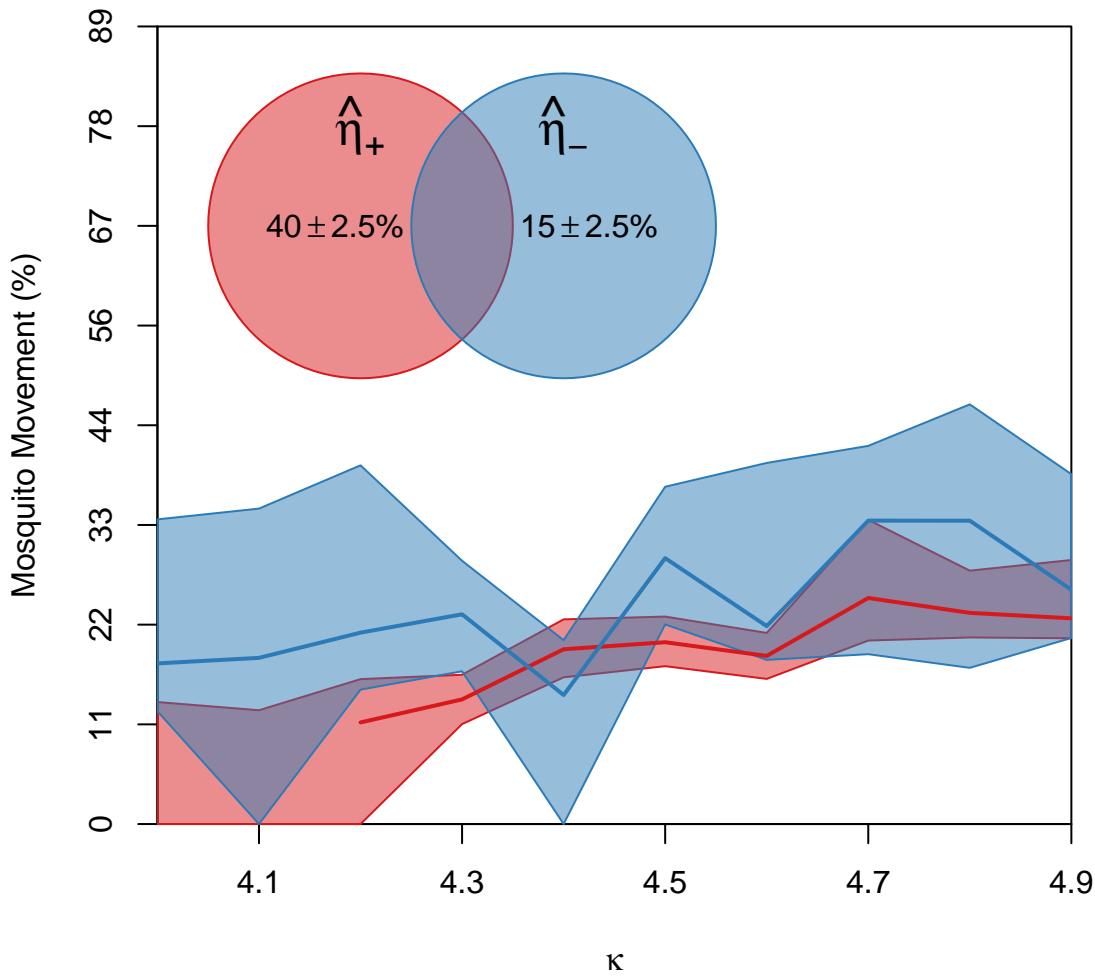

Supplement: NIHMS555593-supplement-13.pdf [file NIHMS555593-supplement-13.pdf]

K

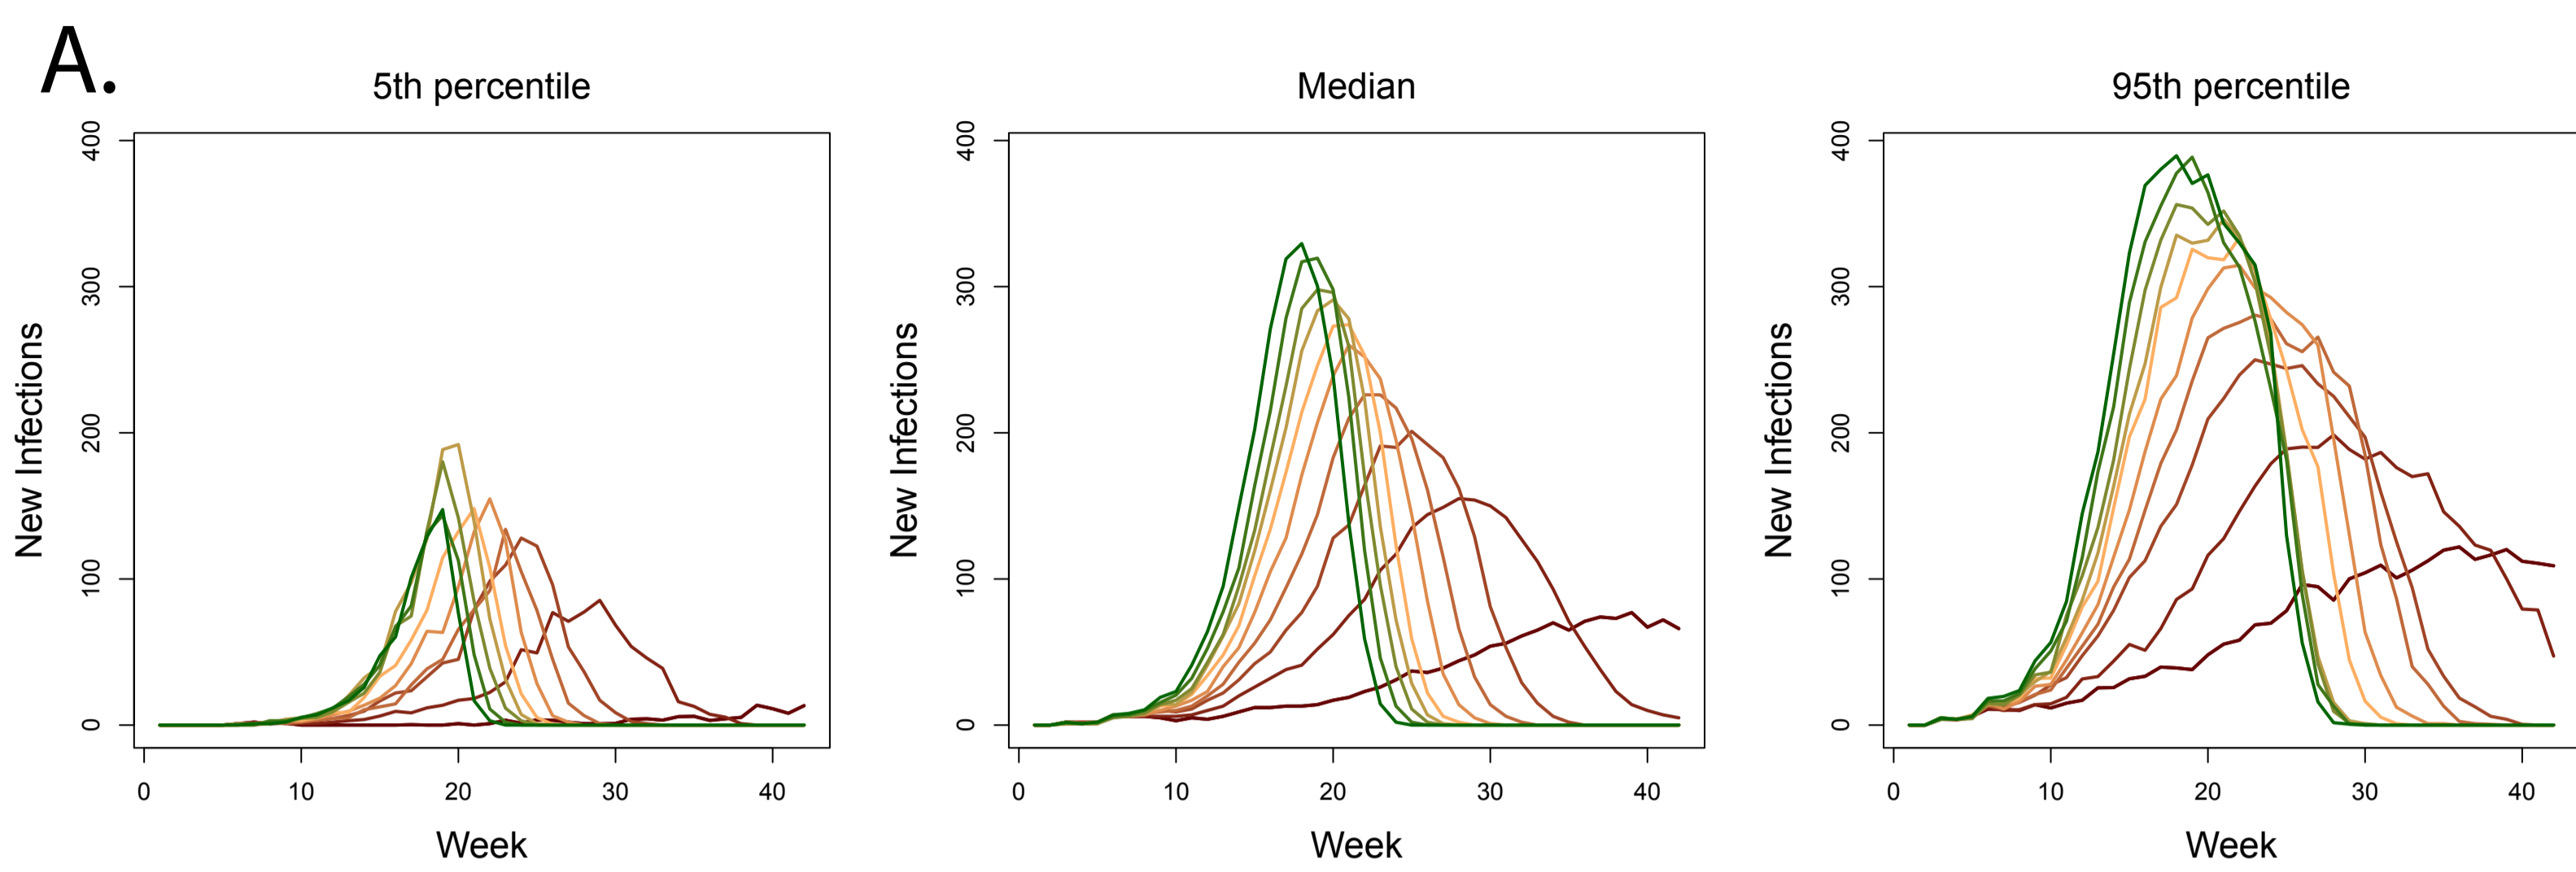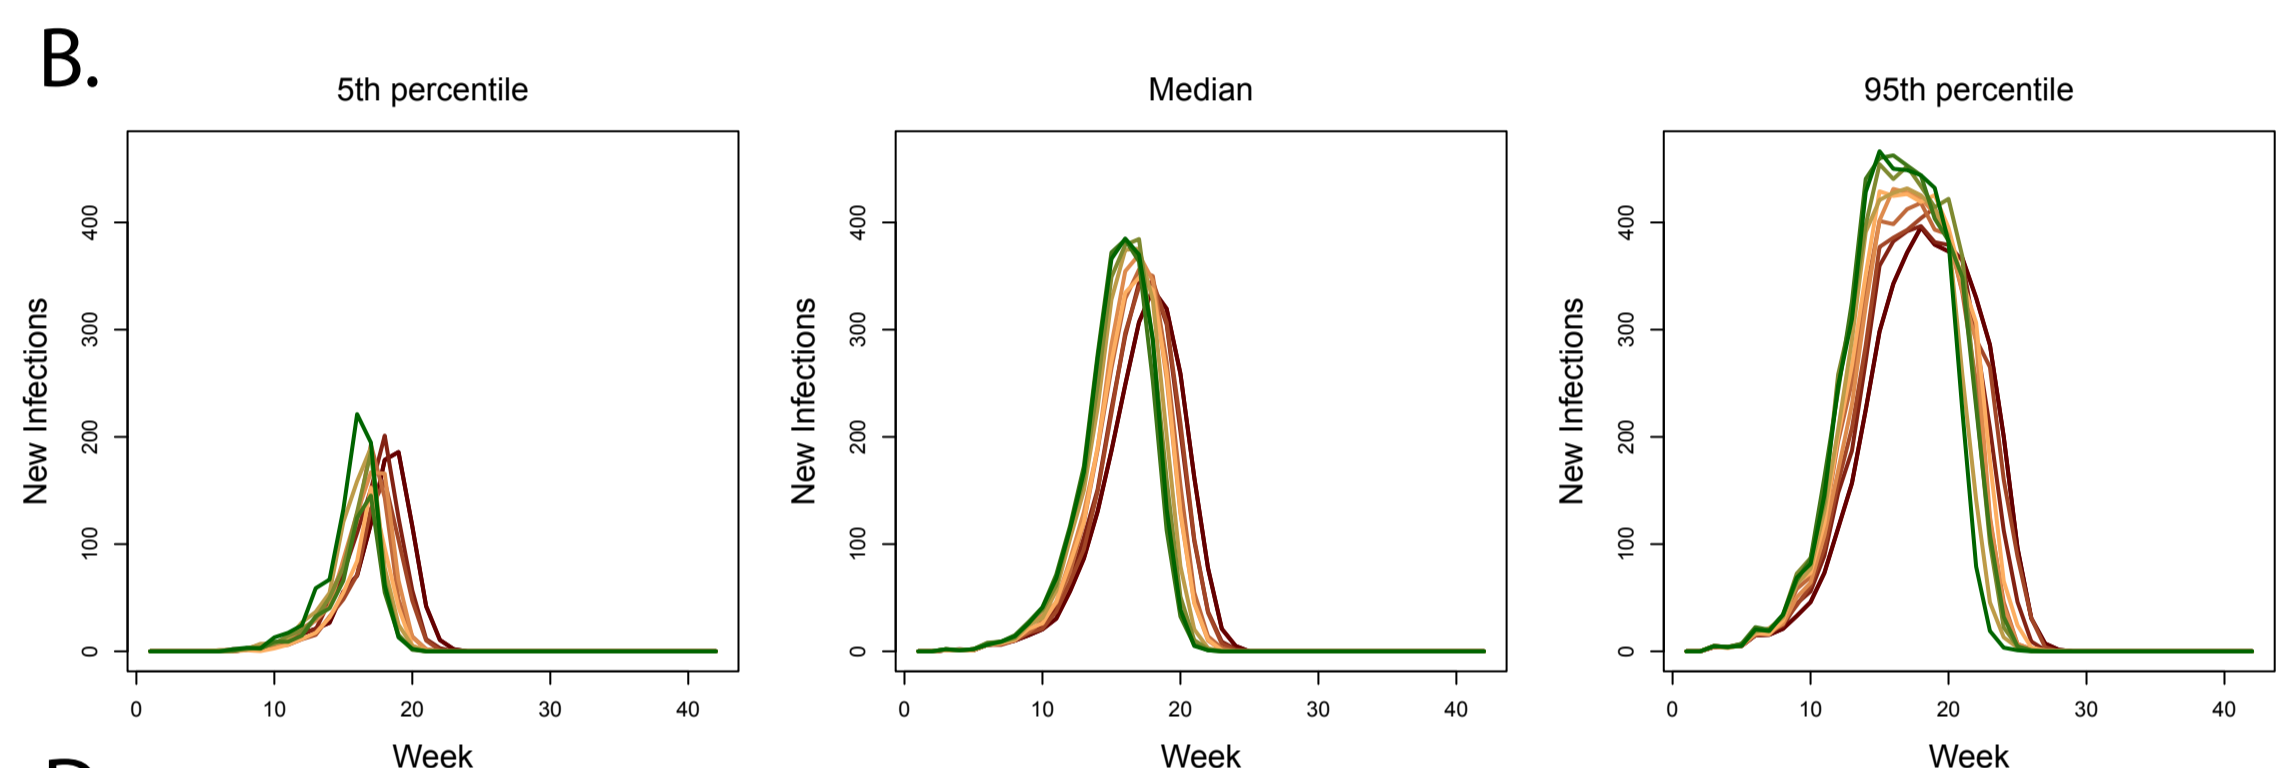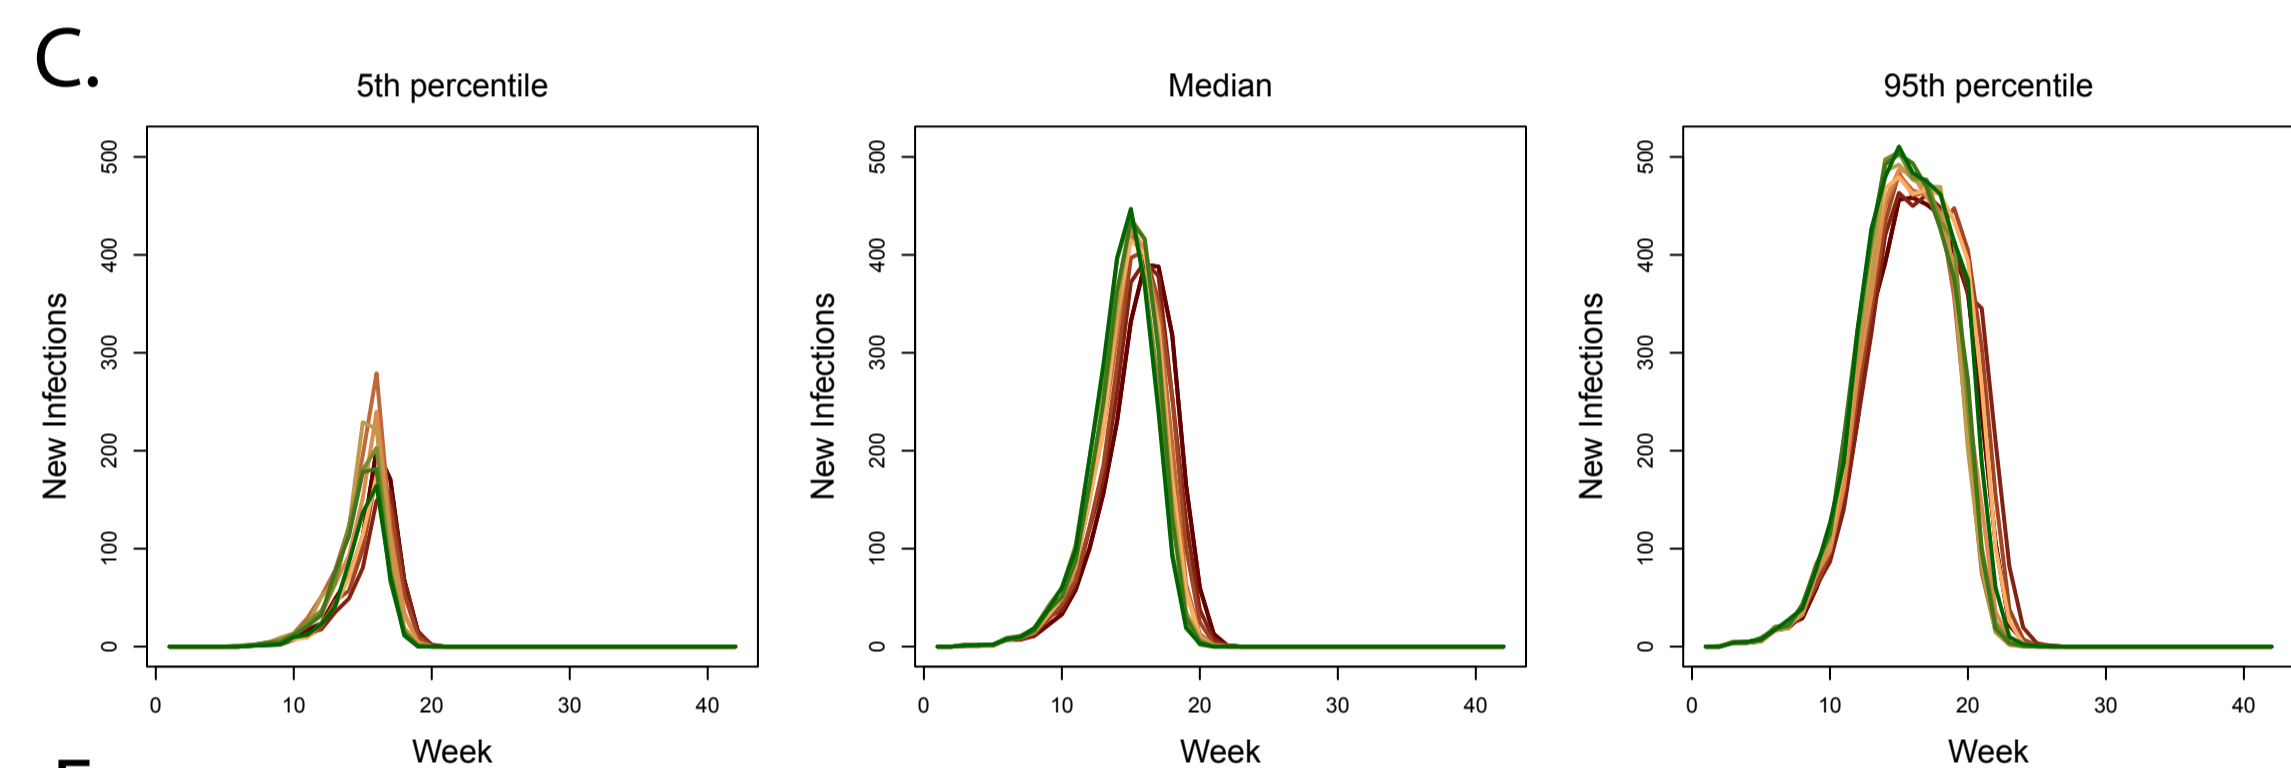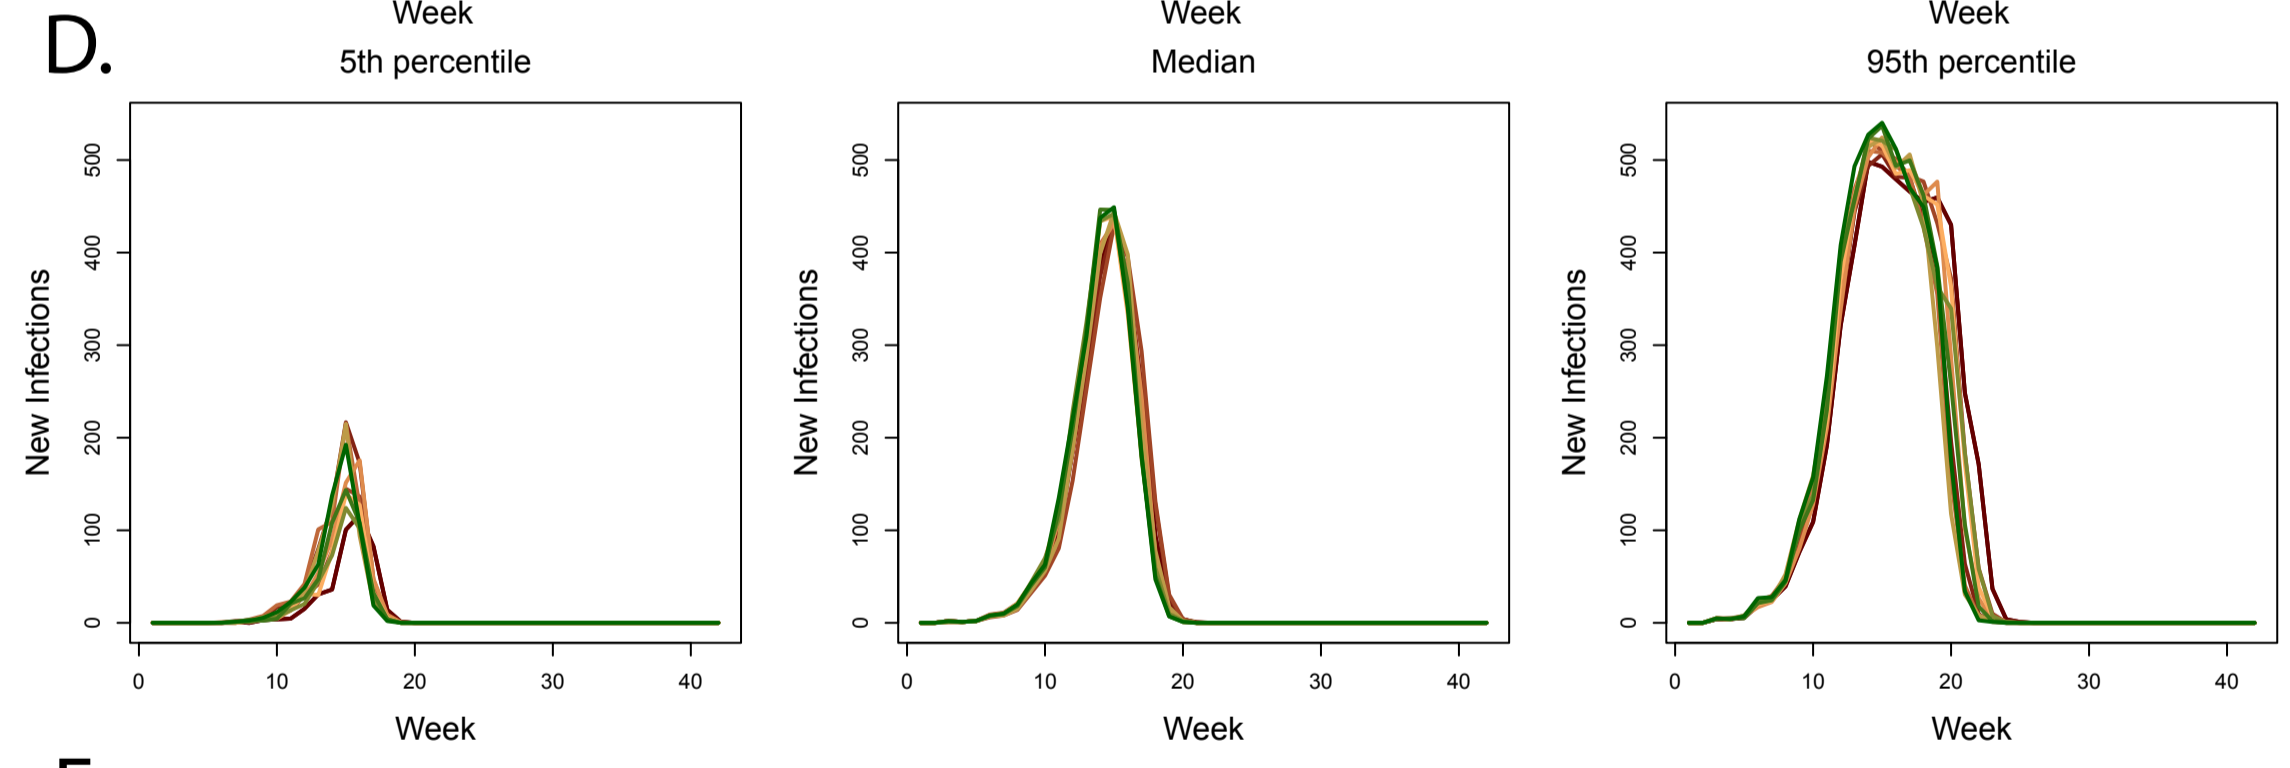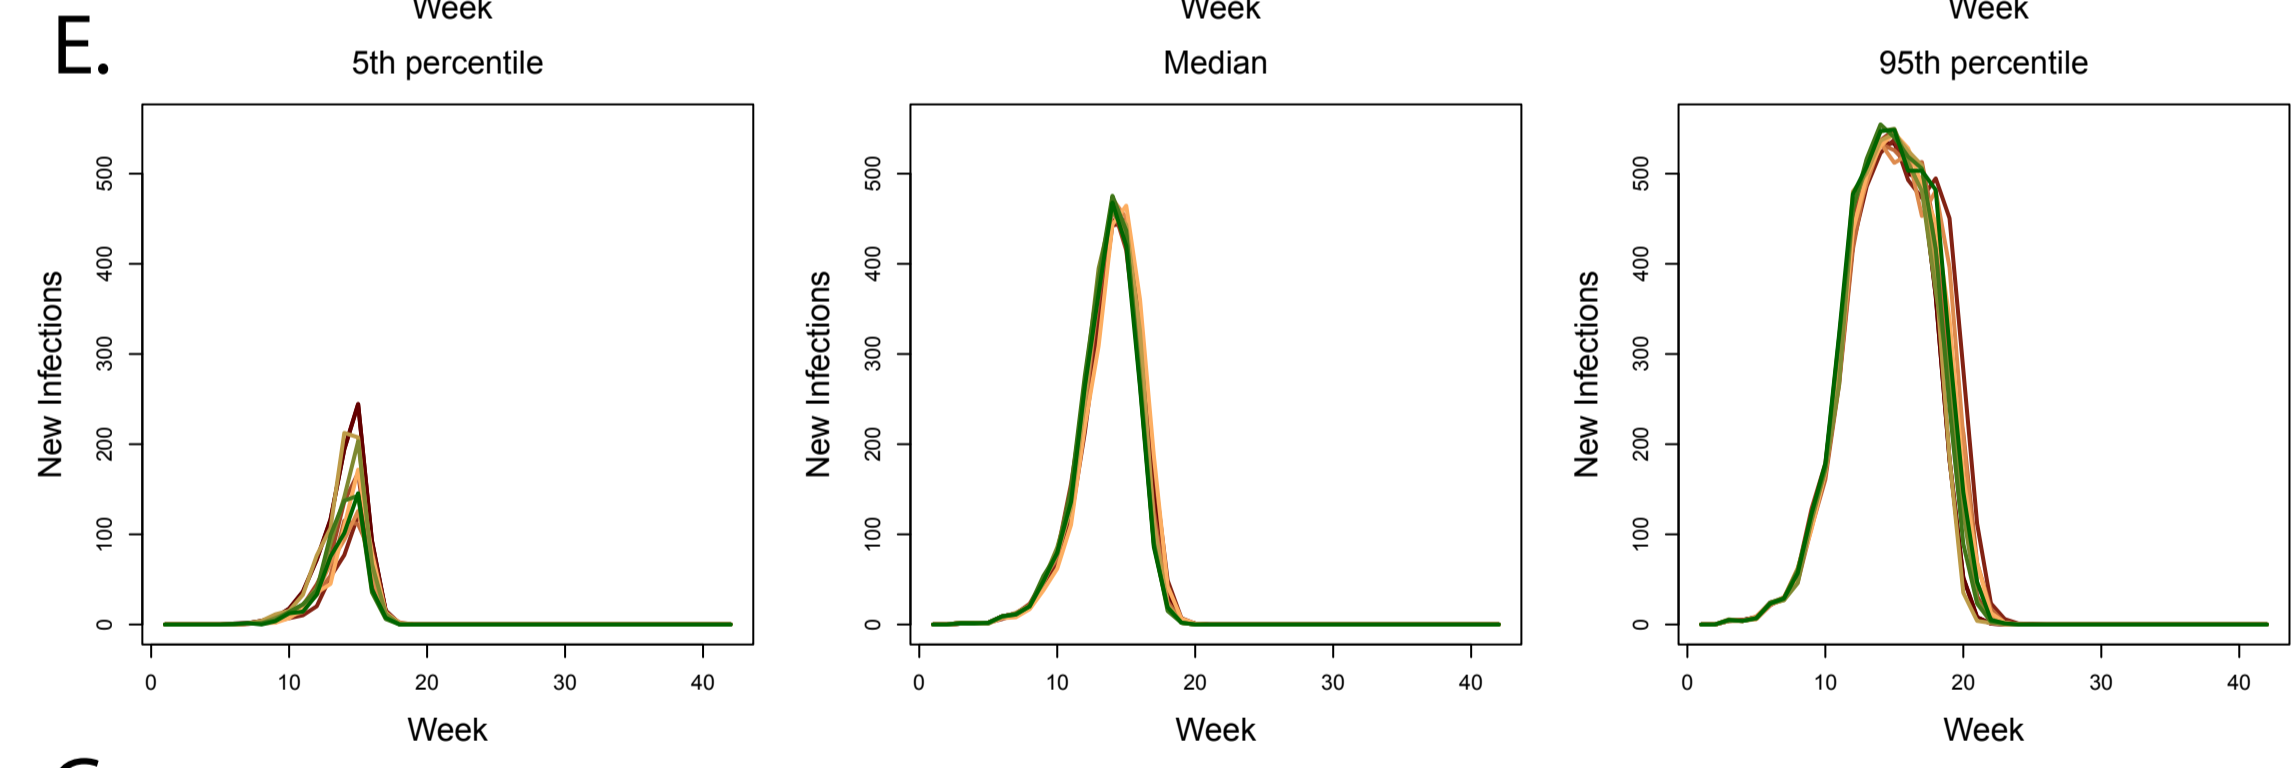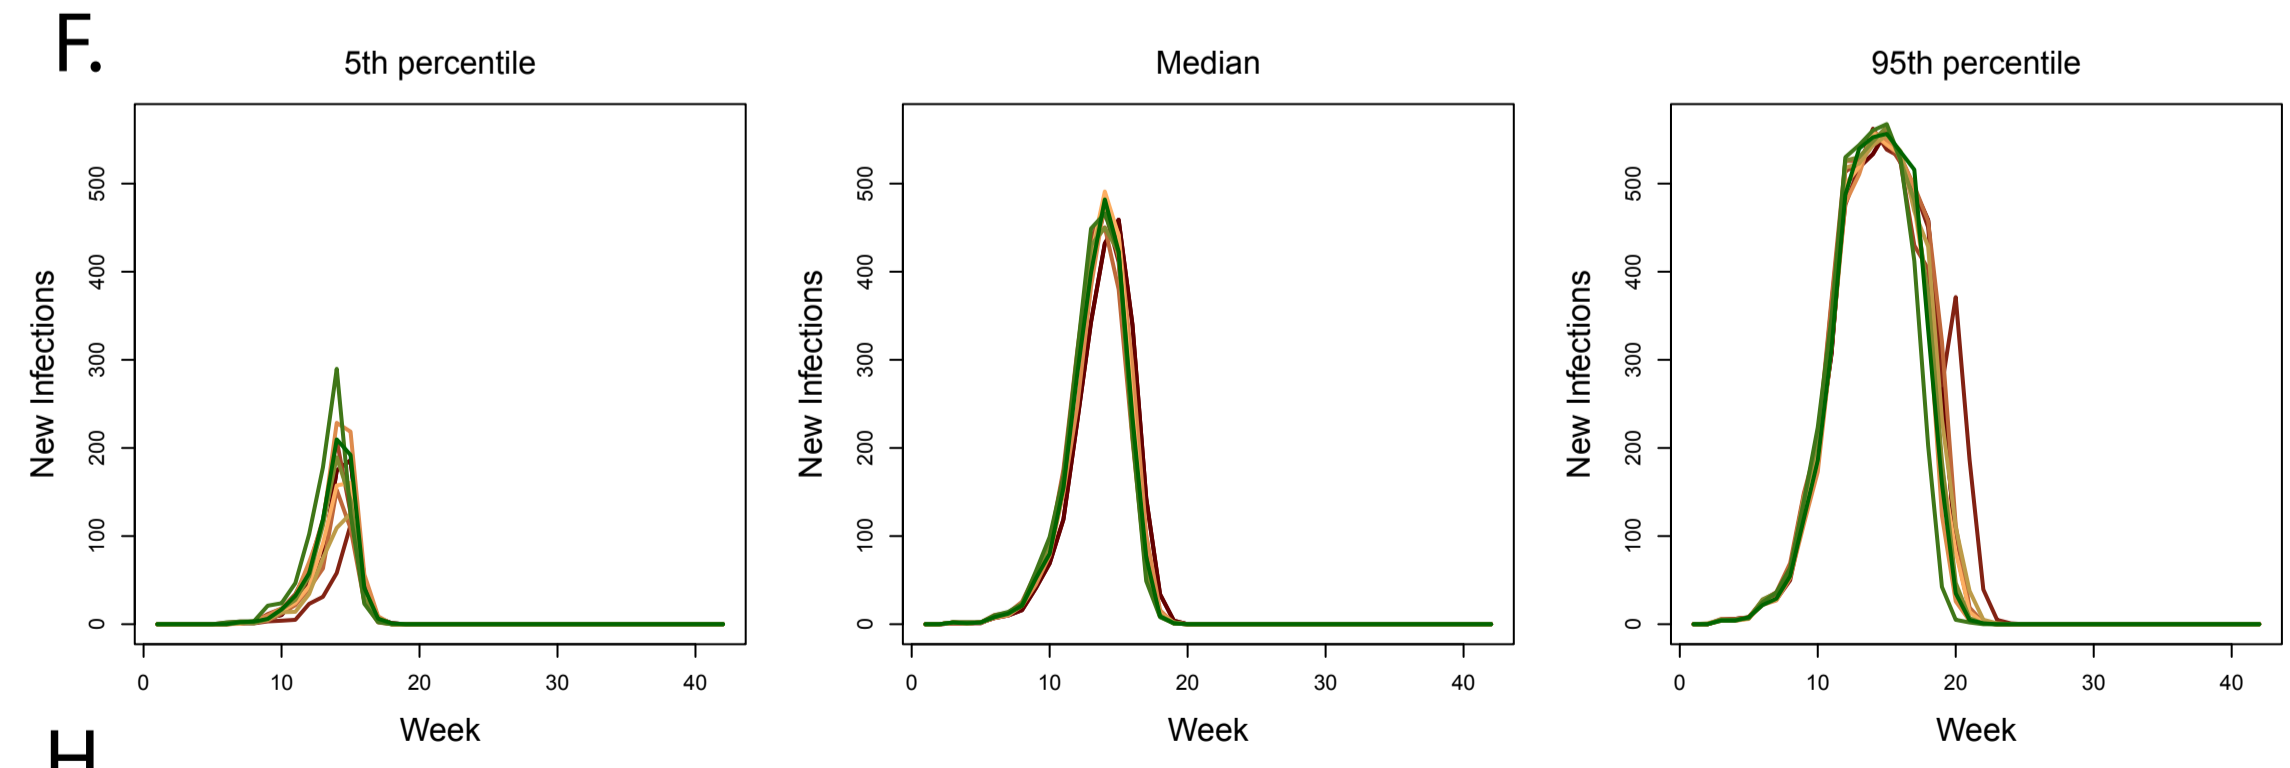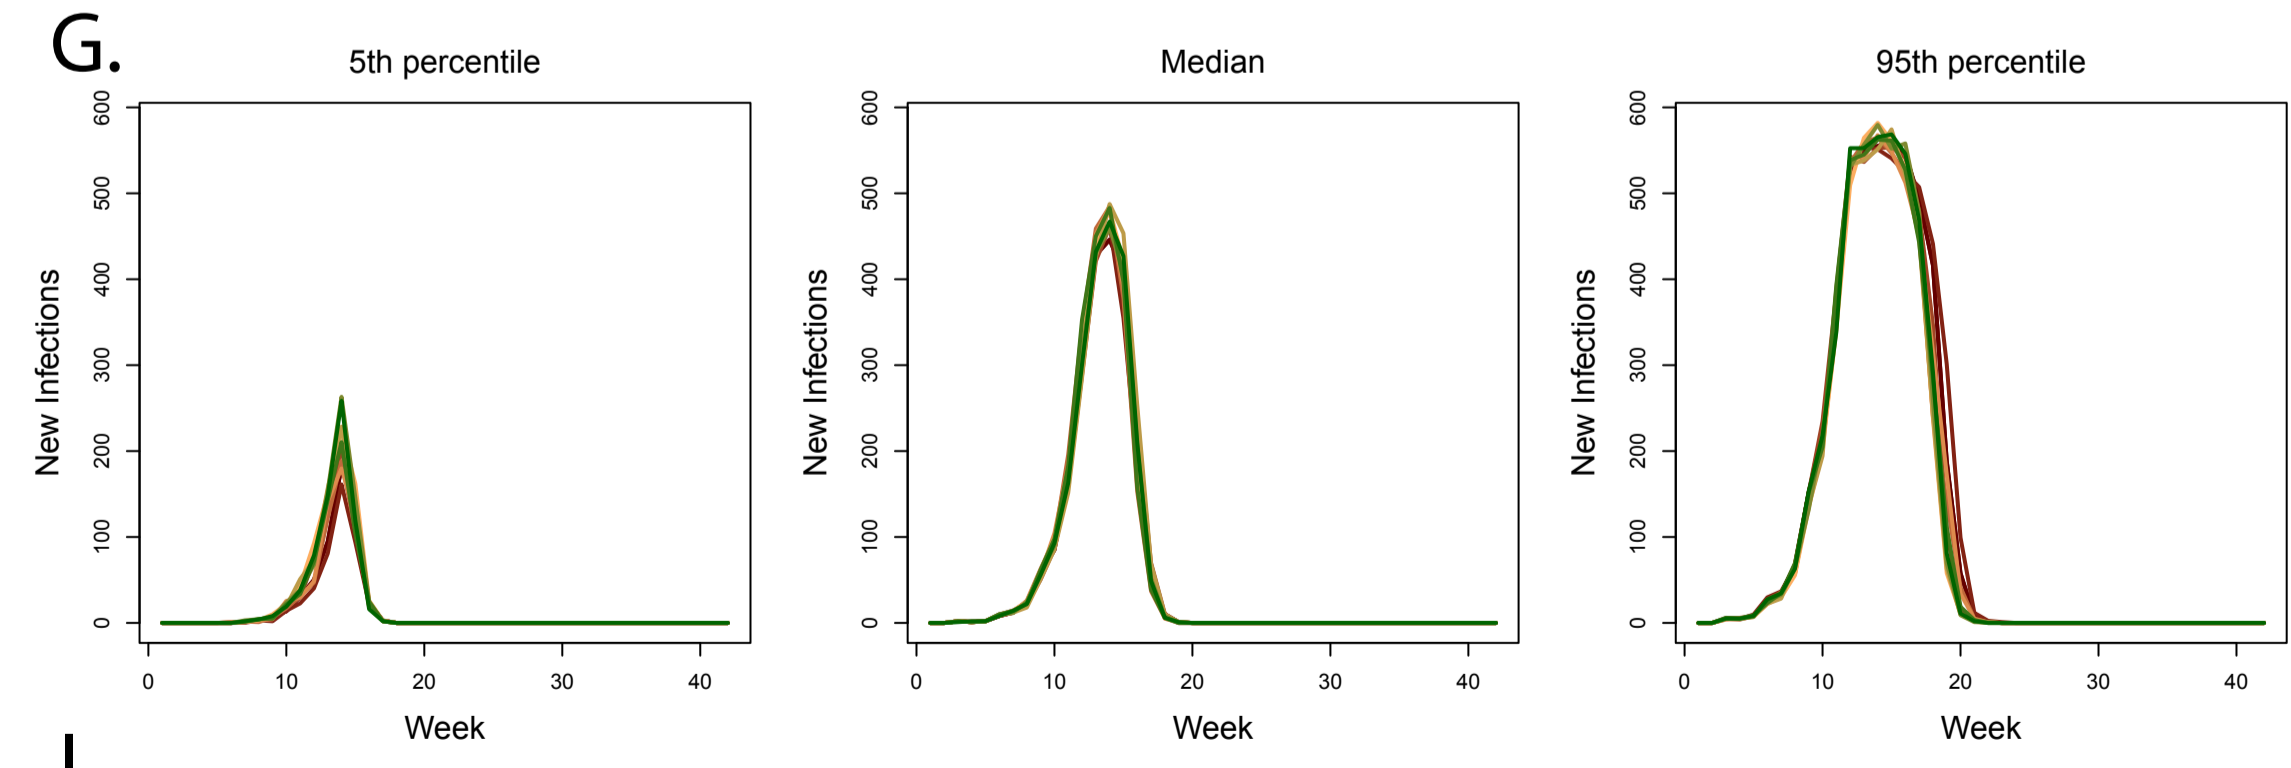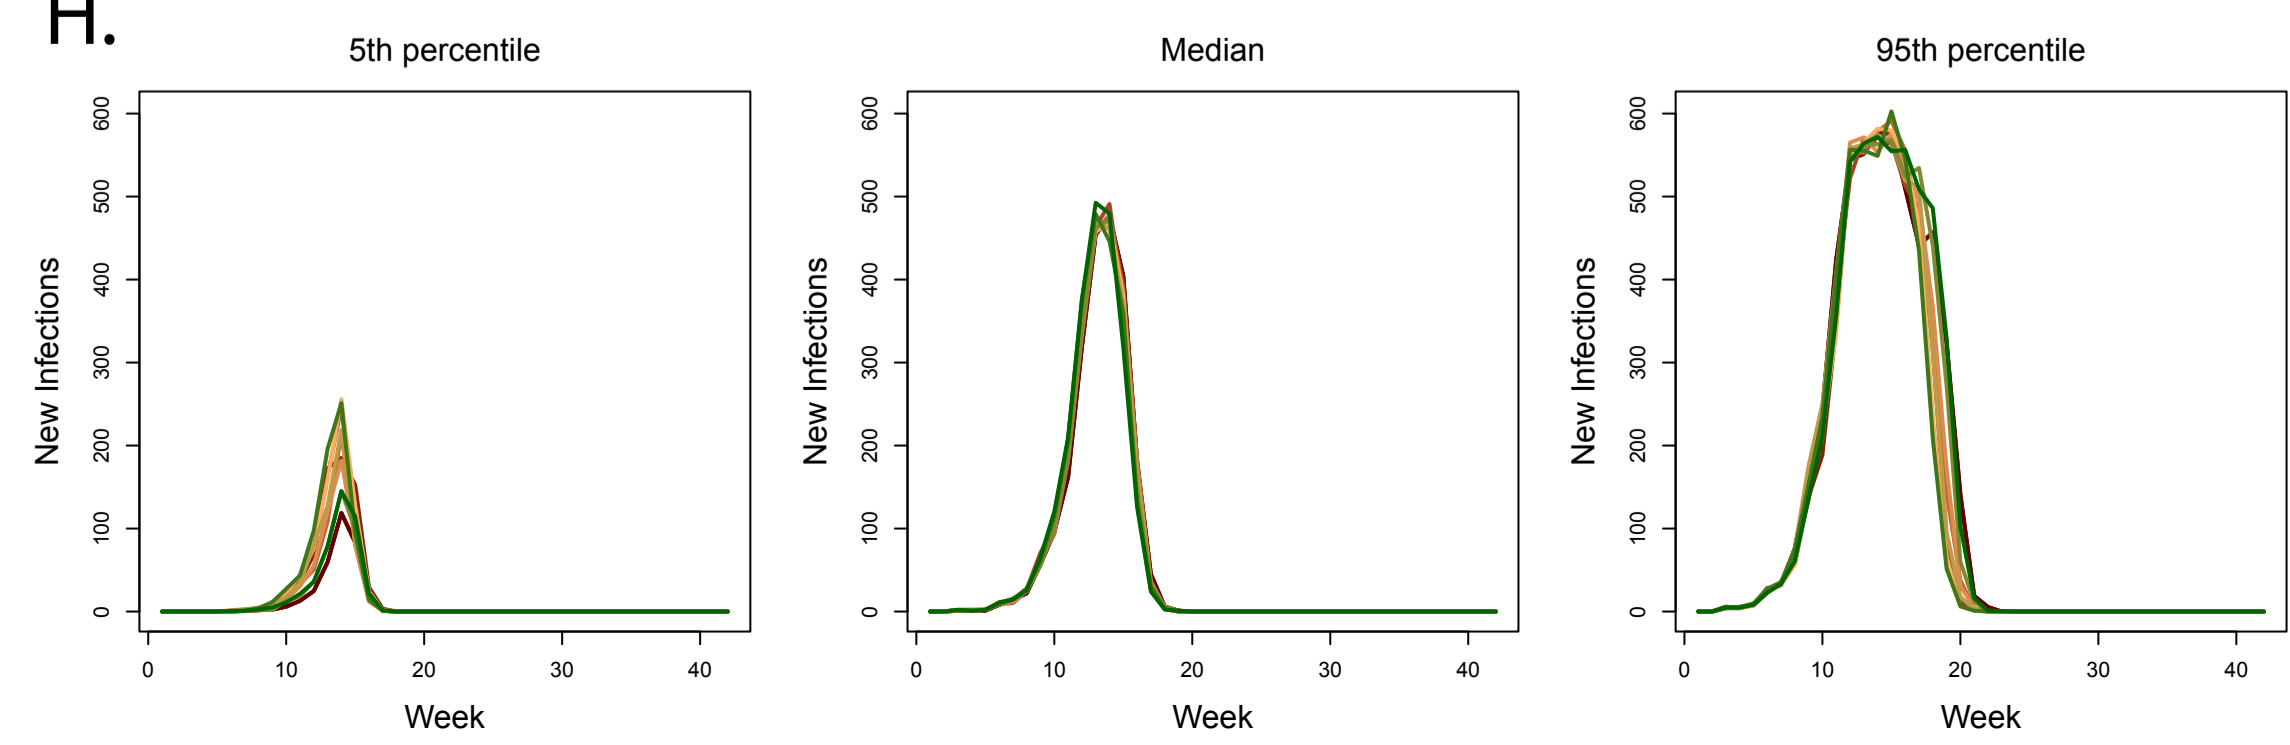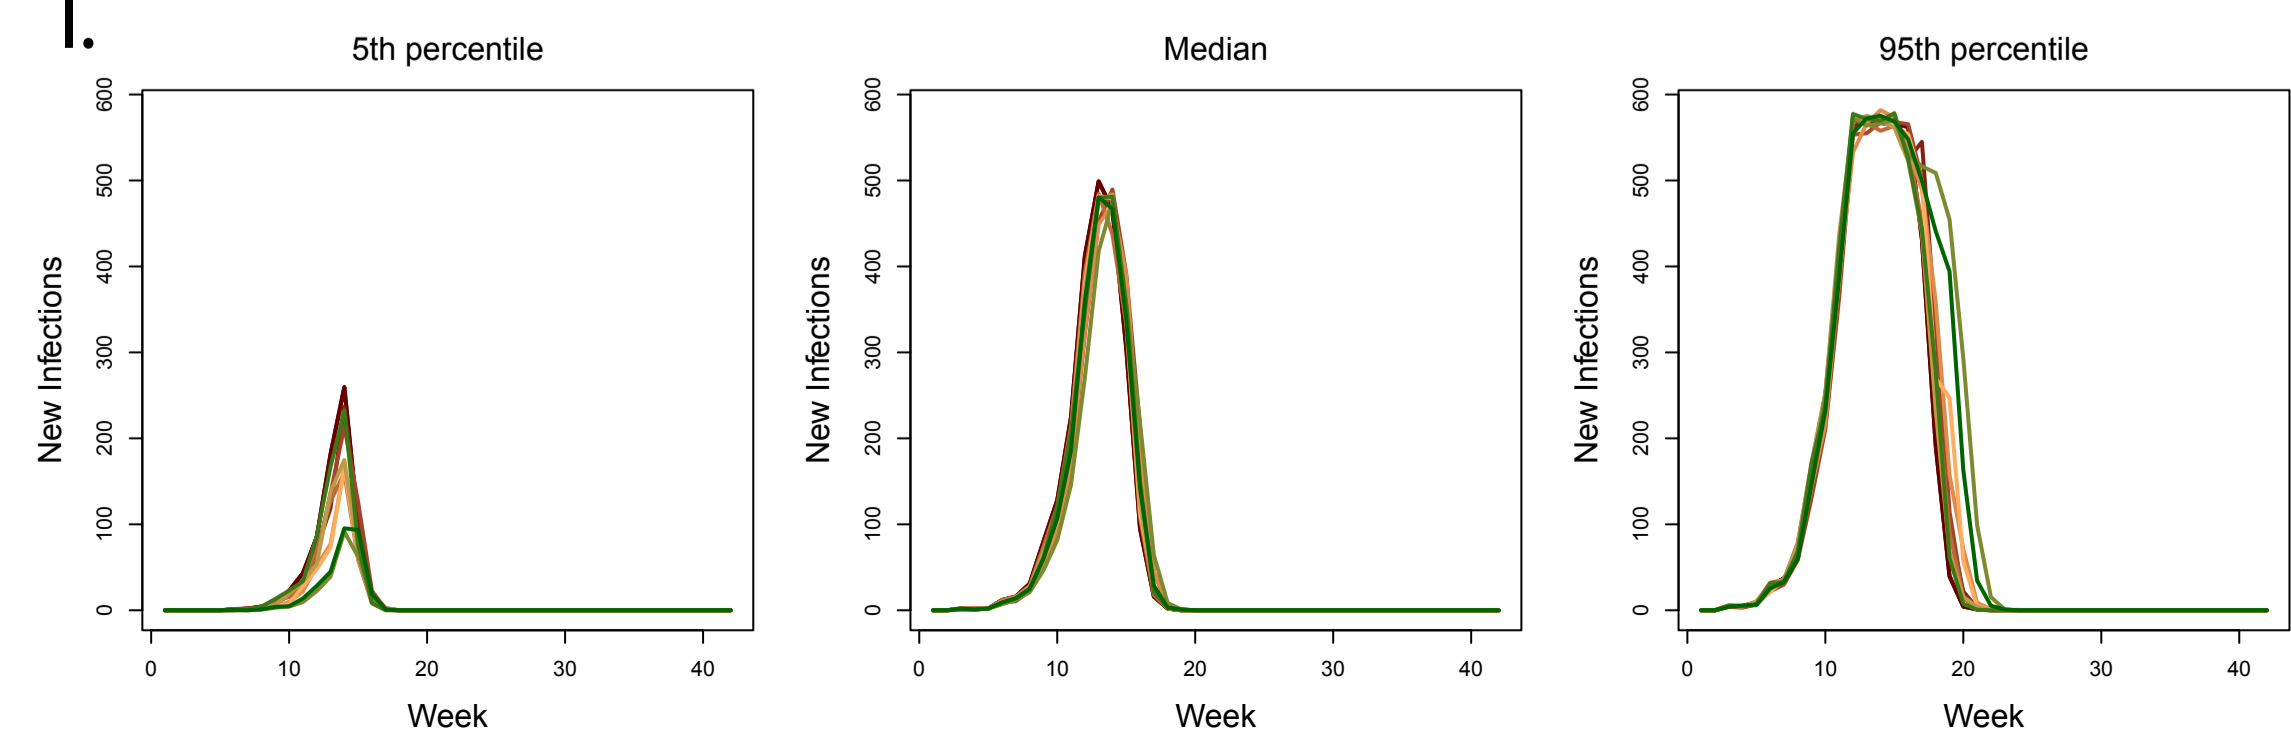

Supplement: NIHMS555593-supplement-14.pdf [file NIHMS555593-supplement-14.pdf]

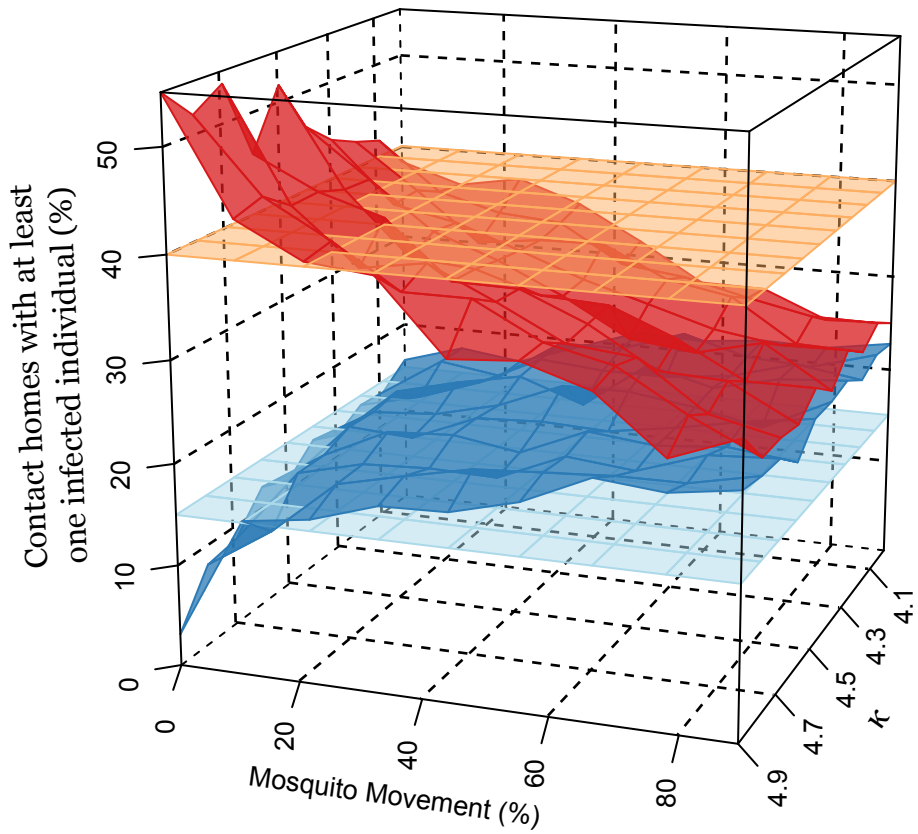

Supplement: NIHMS555593-supplement-15.pdf [file NIHMS555593-supplement-15.pdf]

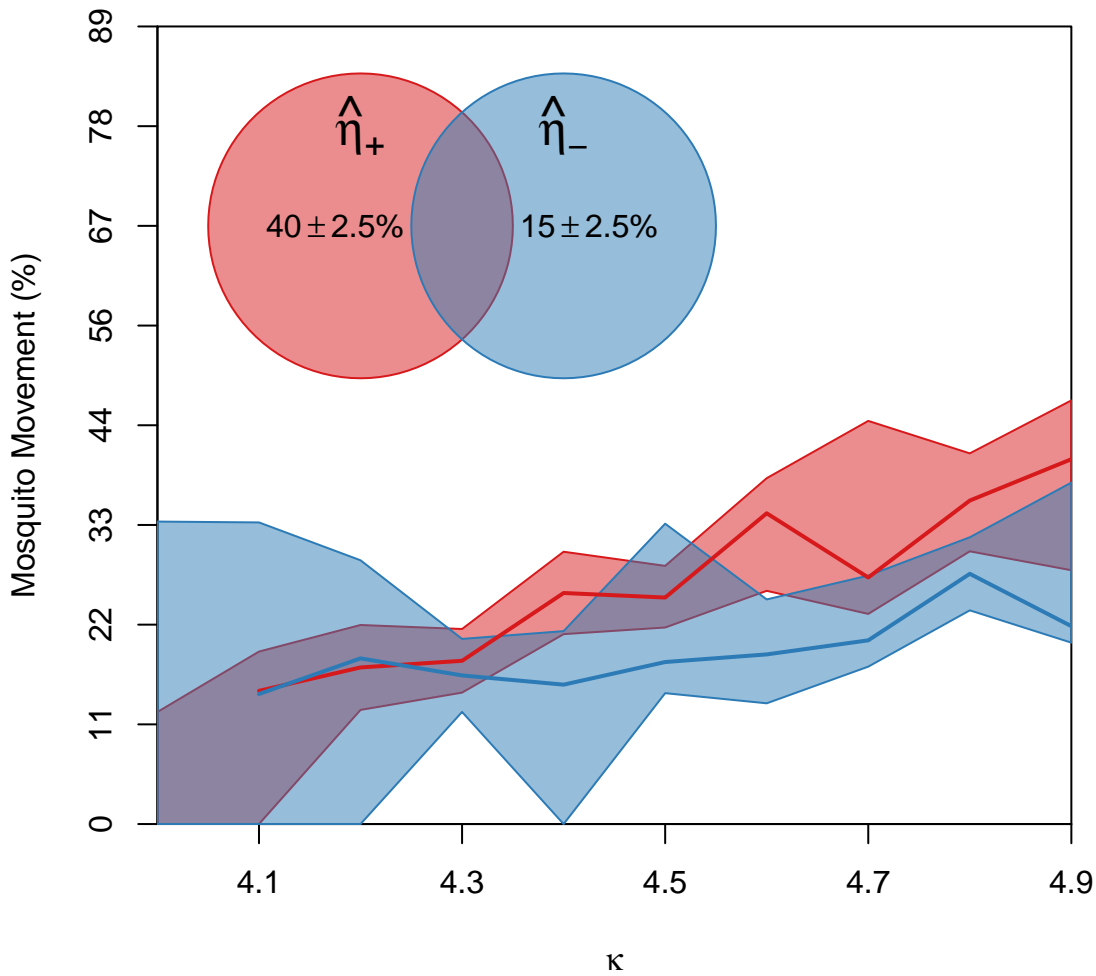

Supplement: NIHMS555593-supplement-16.pdf [file NIHMS555593-supplement-16.pdf]

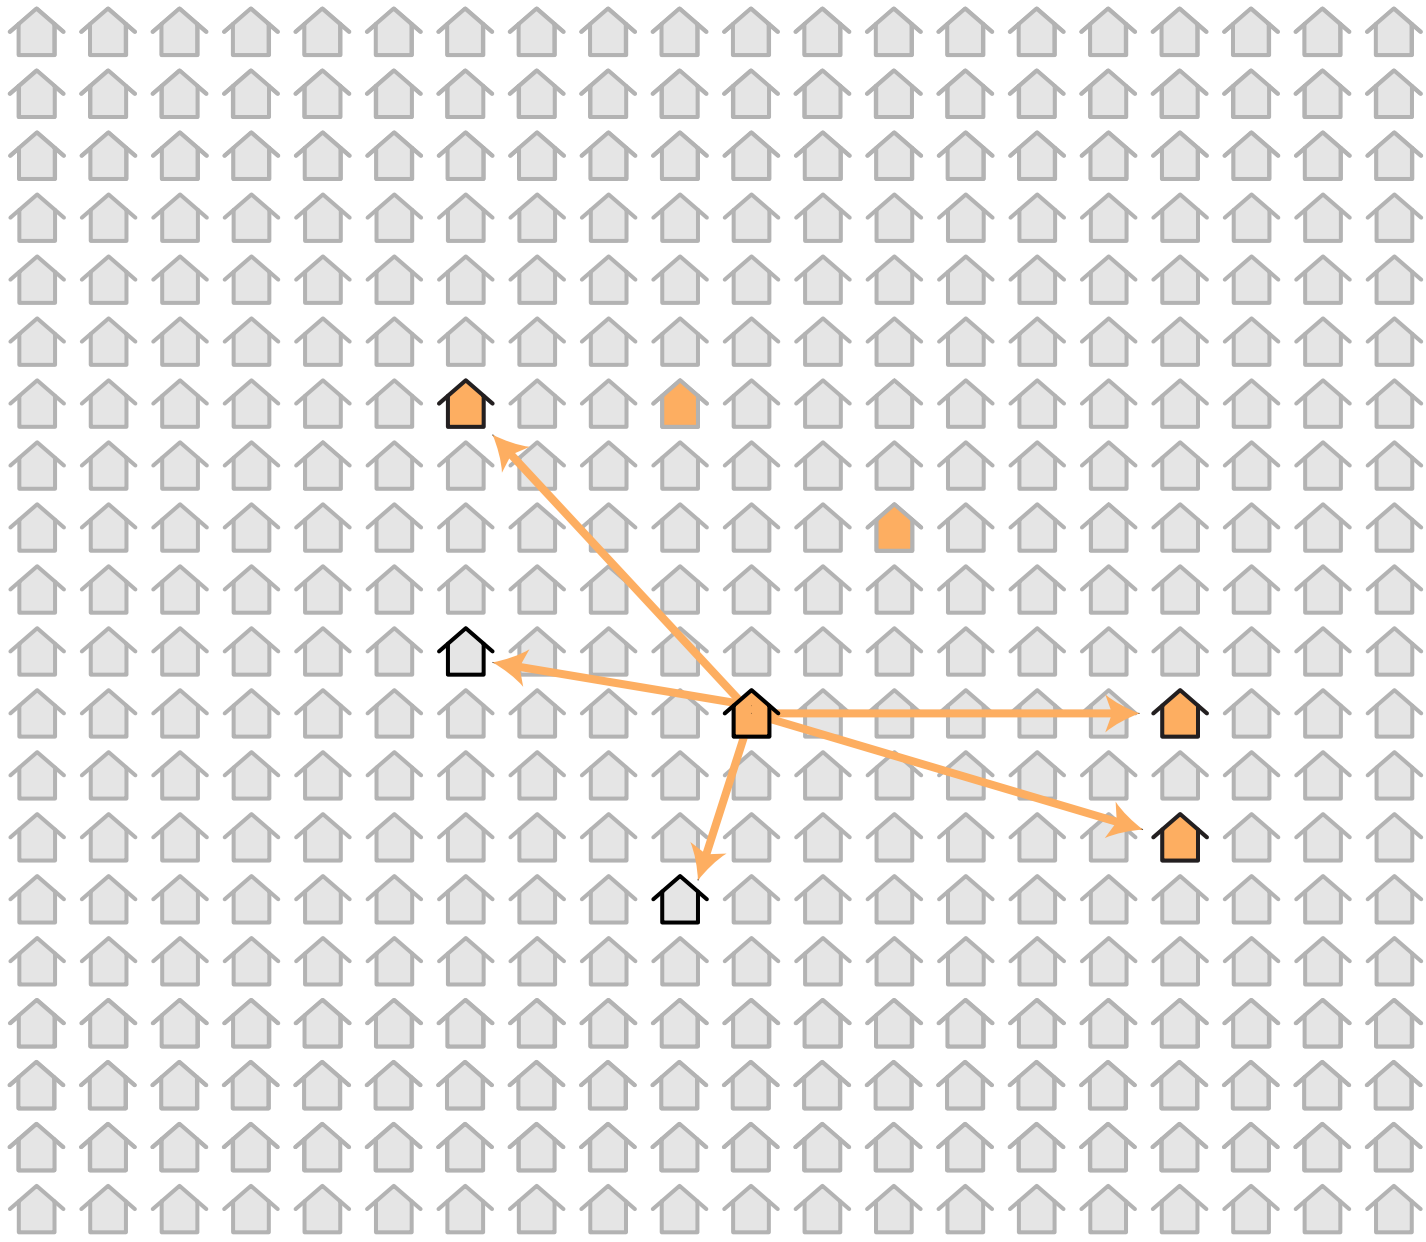

Supplement: NIHMS555593-supplement-2.pdf [file NIHMS555593-supplement-2.pdf]

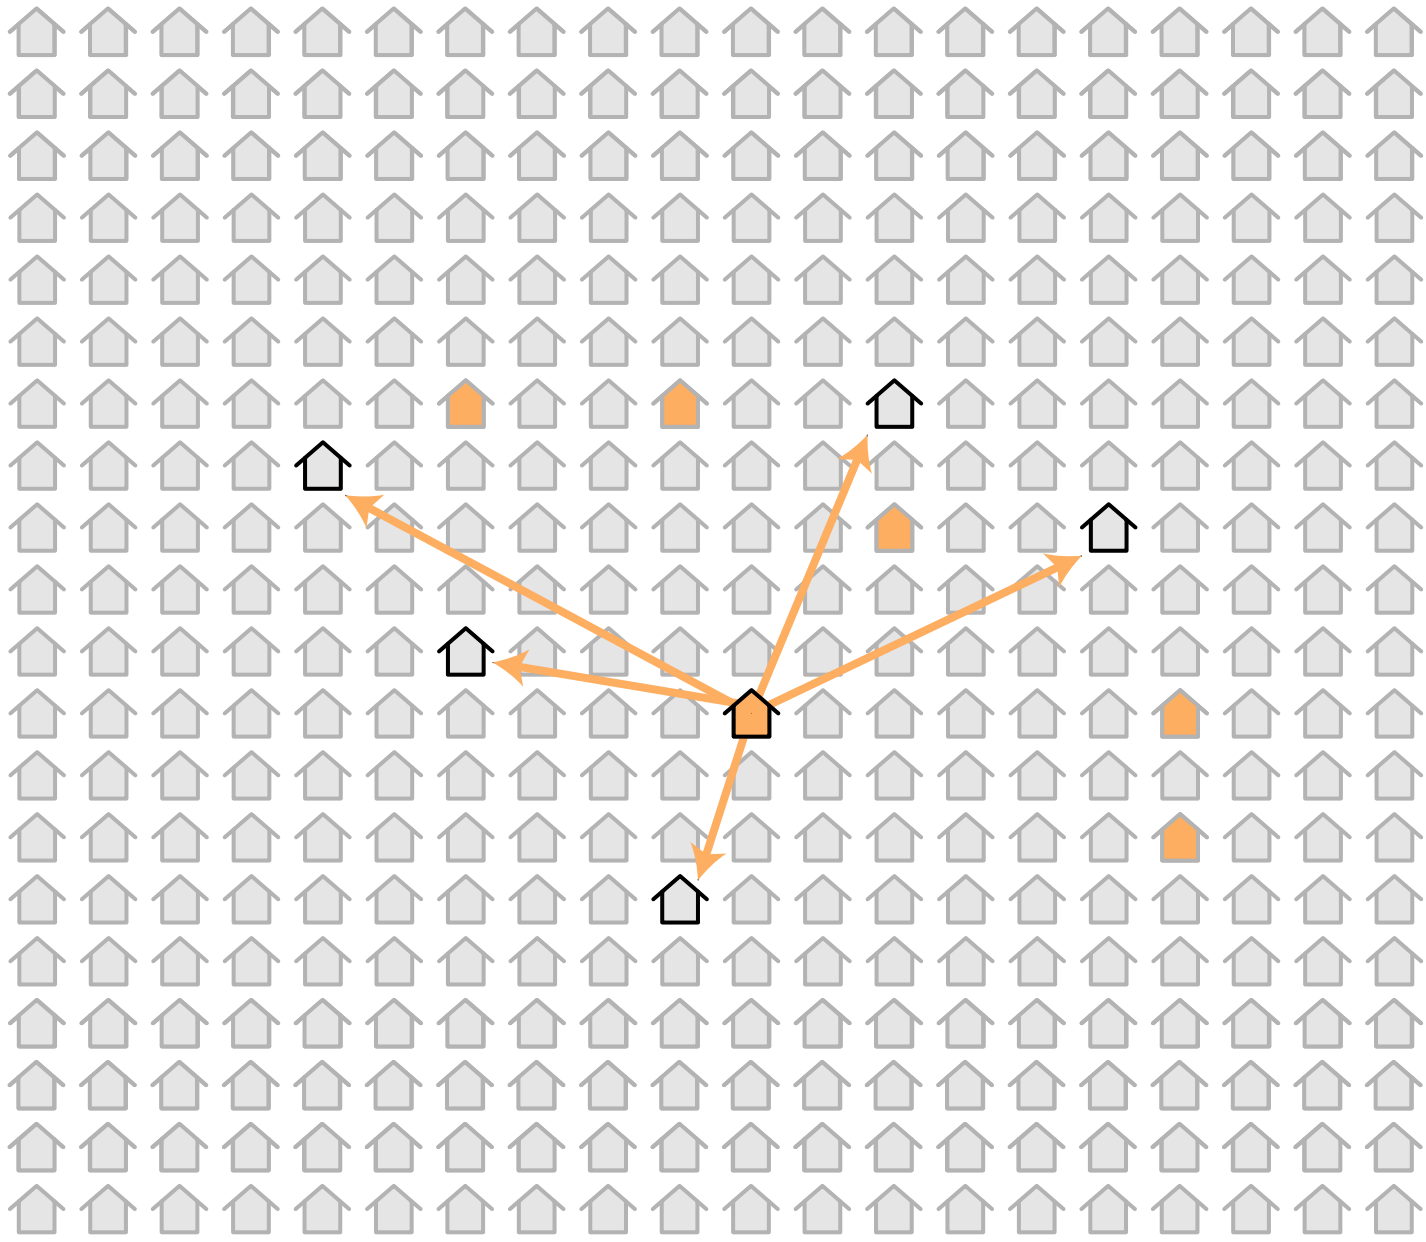

Supplement: NIHMS555593-supplement-3.pdf [file NIHMS555593-supplement-3.pdf]

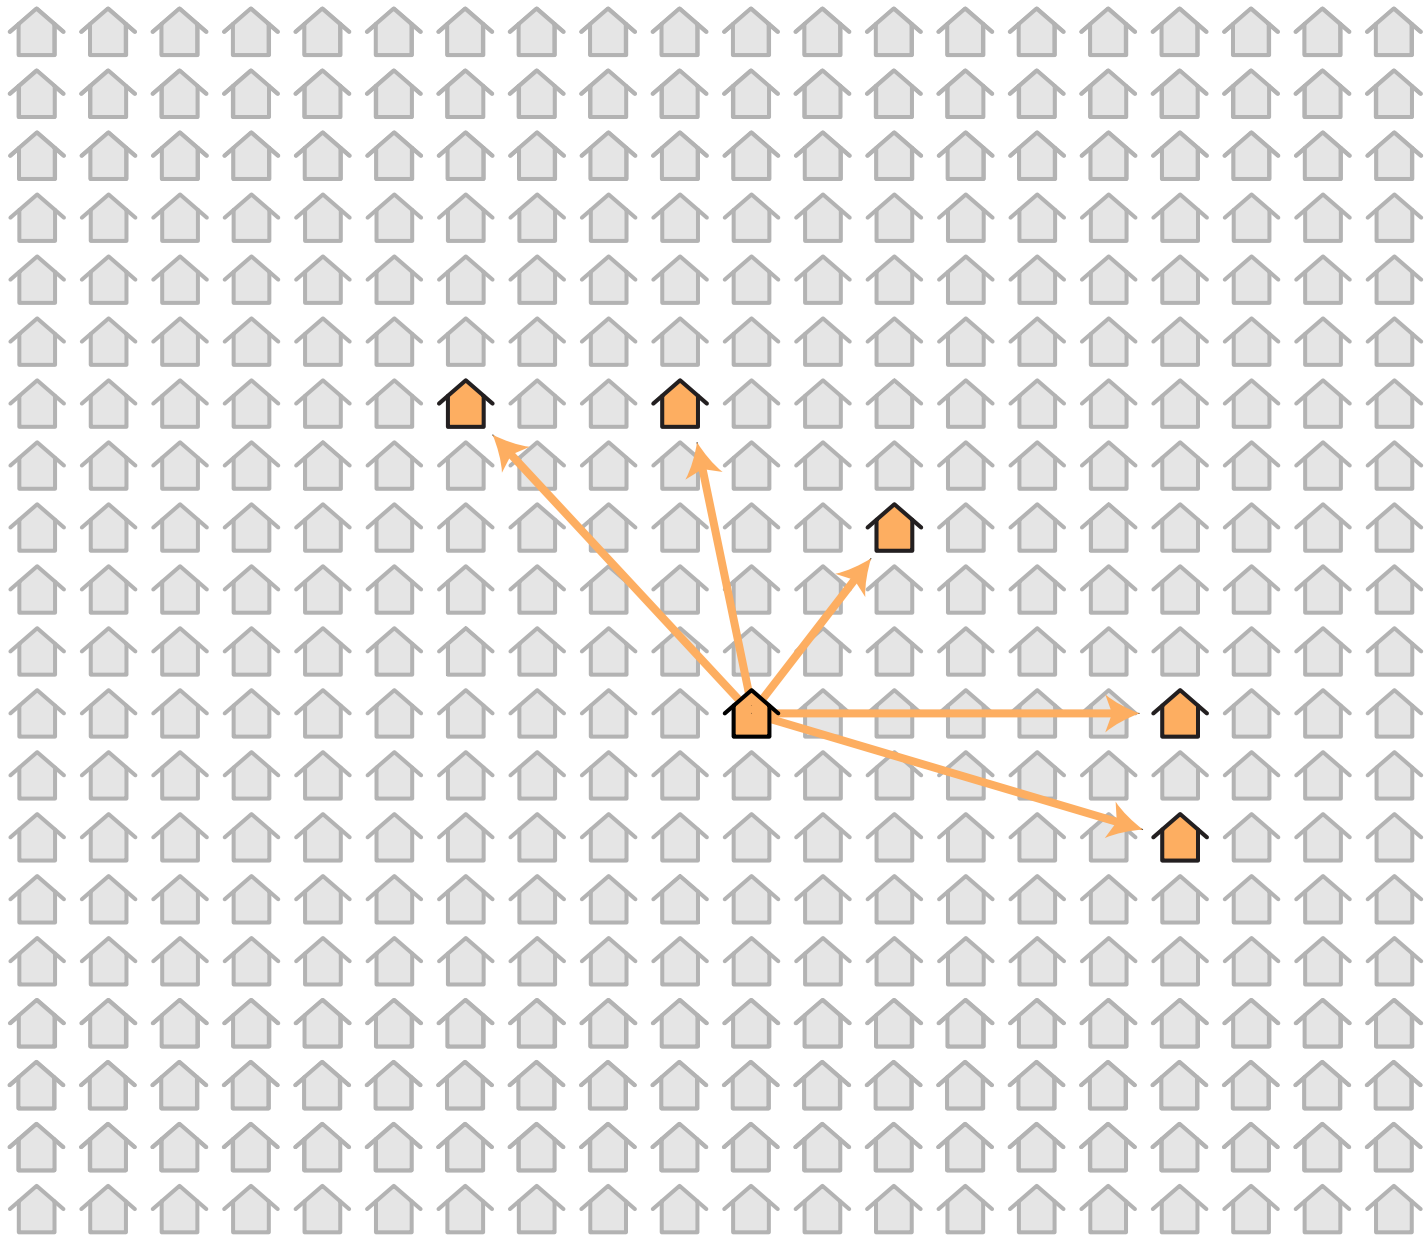

Supplement: NIHMS555593-supplement-4.pdf [file NIHMS555593-supplement-4.pdf]

K

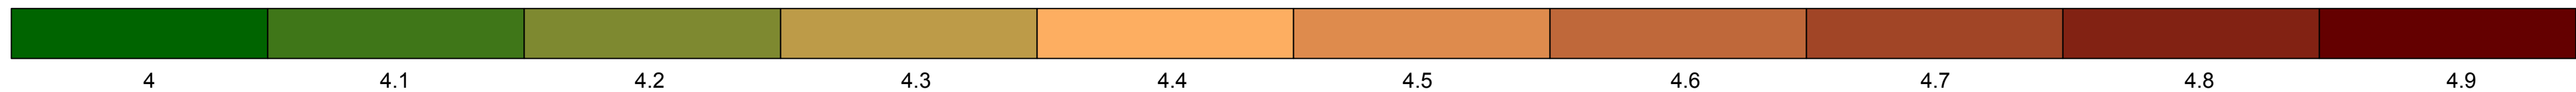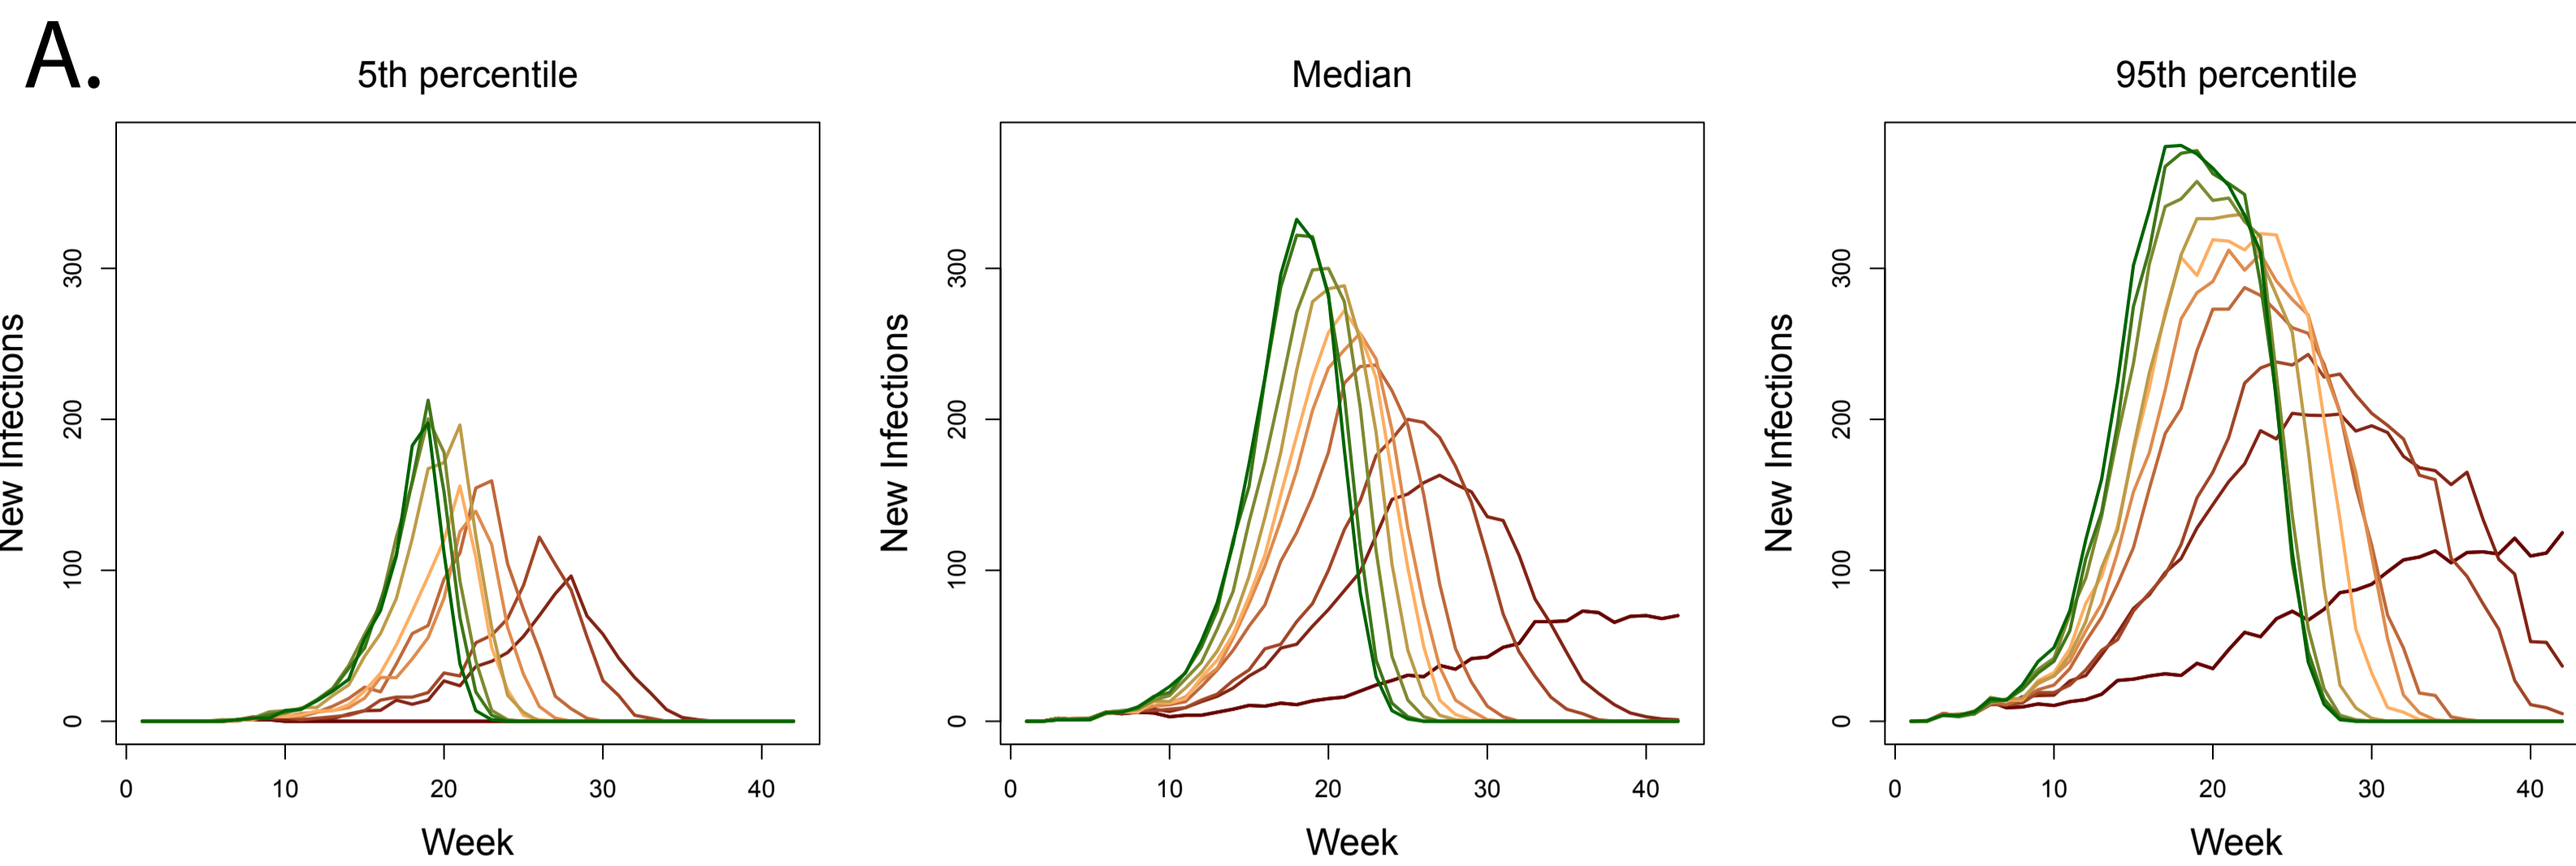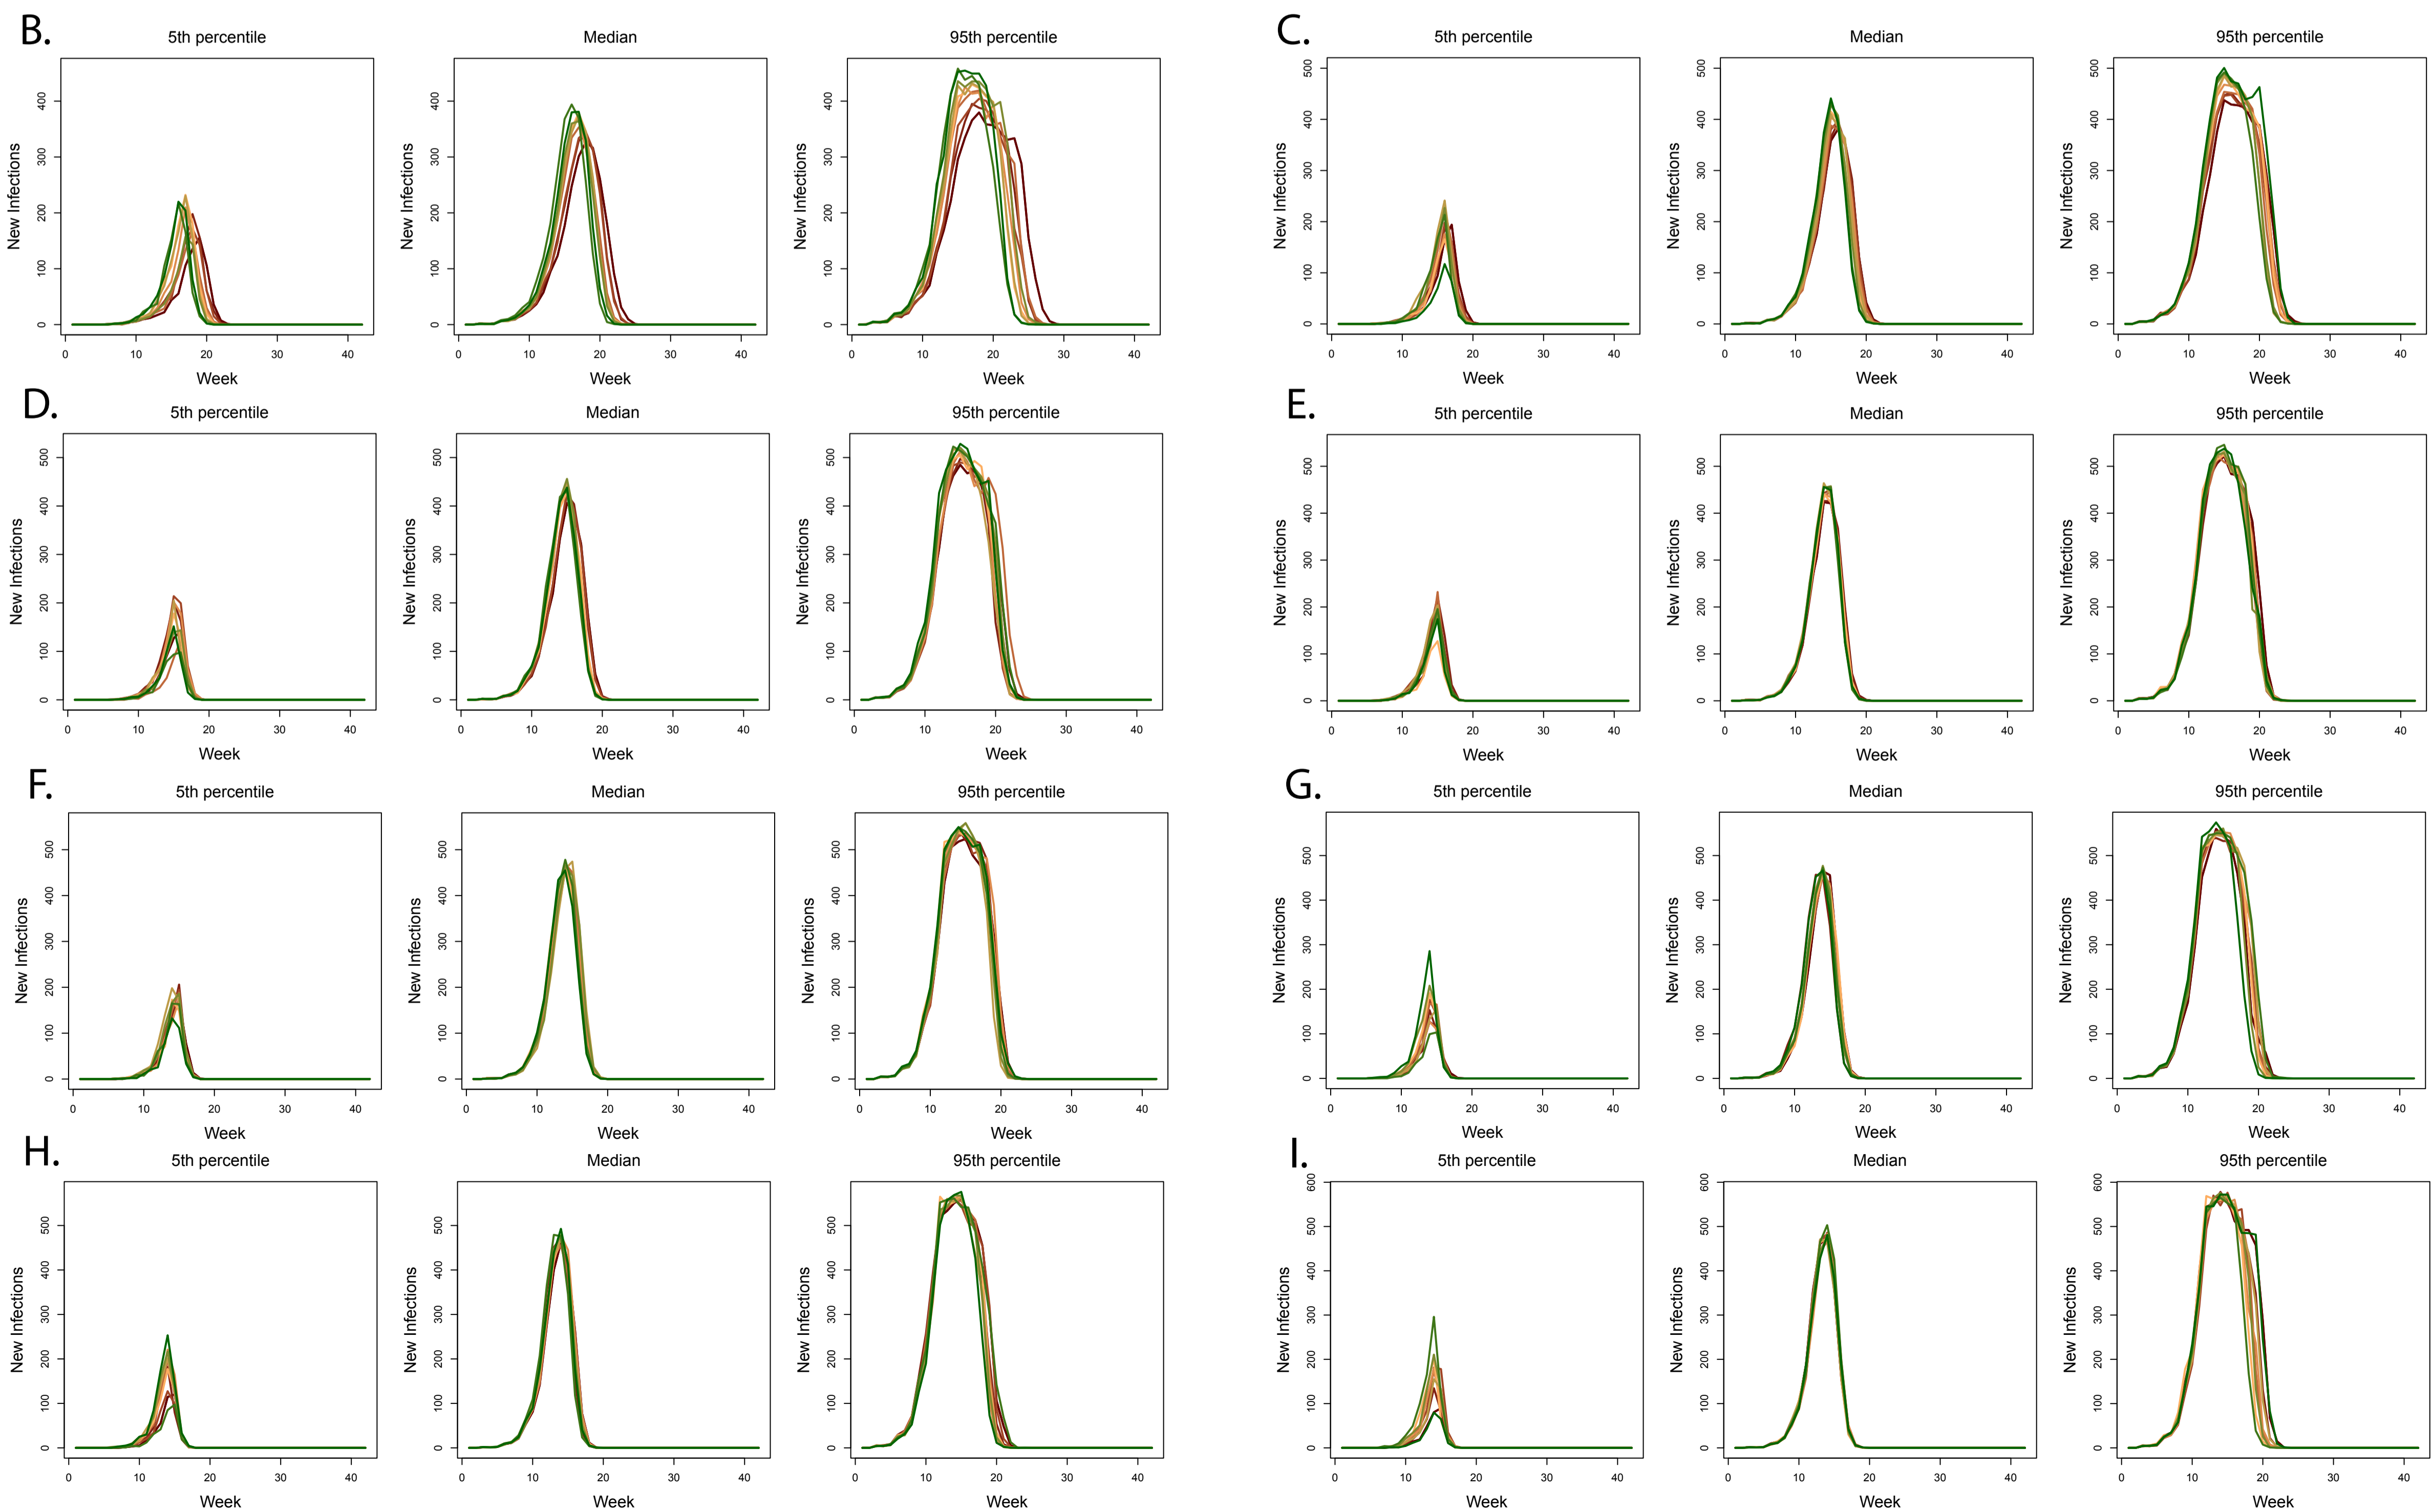

Supplement: NIHMS555593-supplement-5.pdf [file NIHMS555593-supplement-5.pdf]

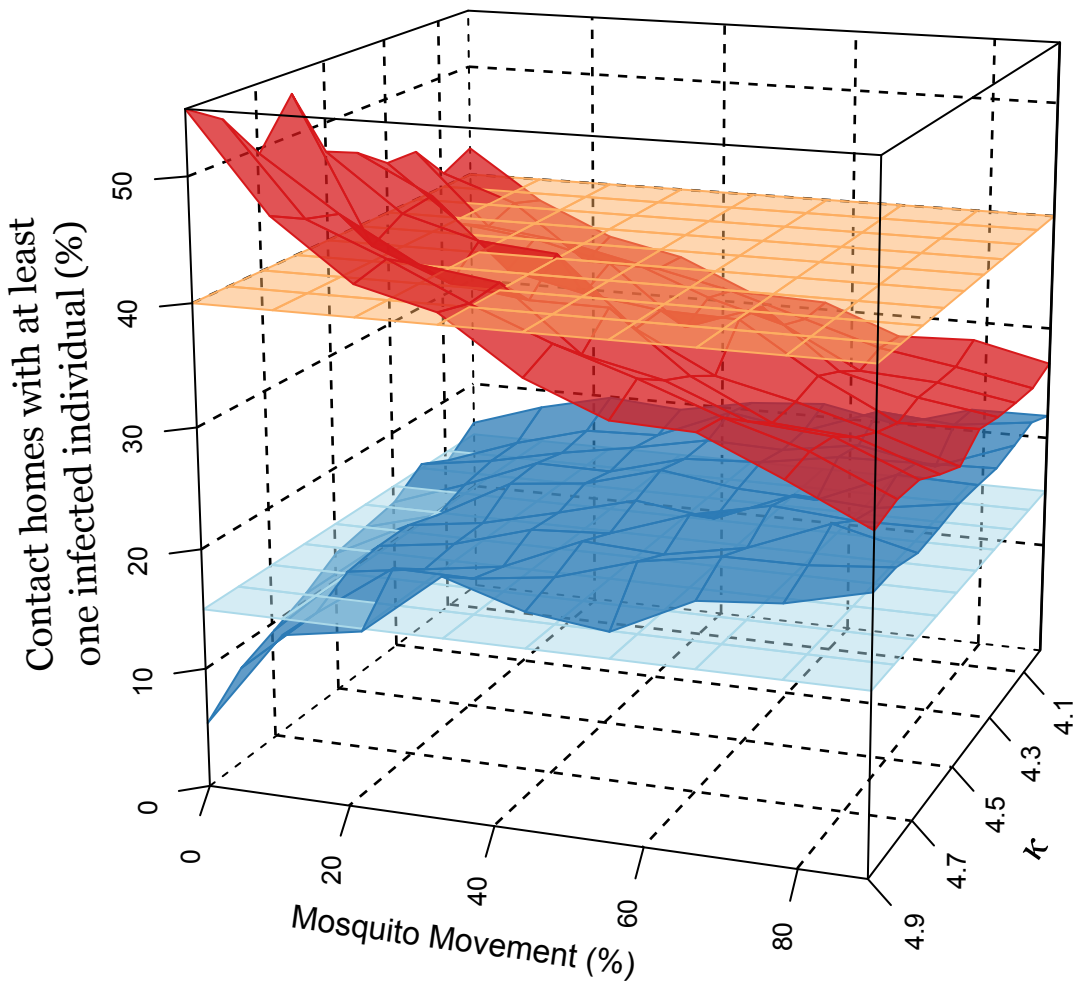

Supplement: NIHMS555593-supplement-6.pdf [file NIHMS555593-supplement-6.pdf]

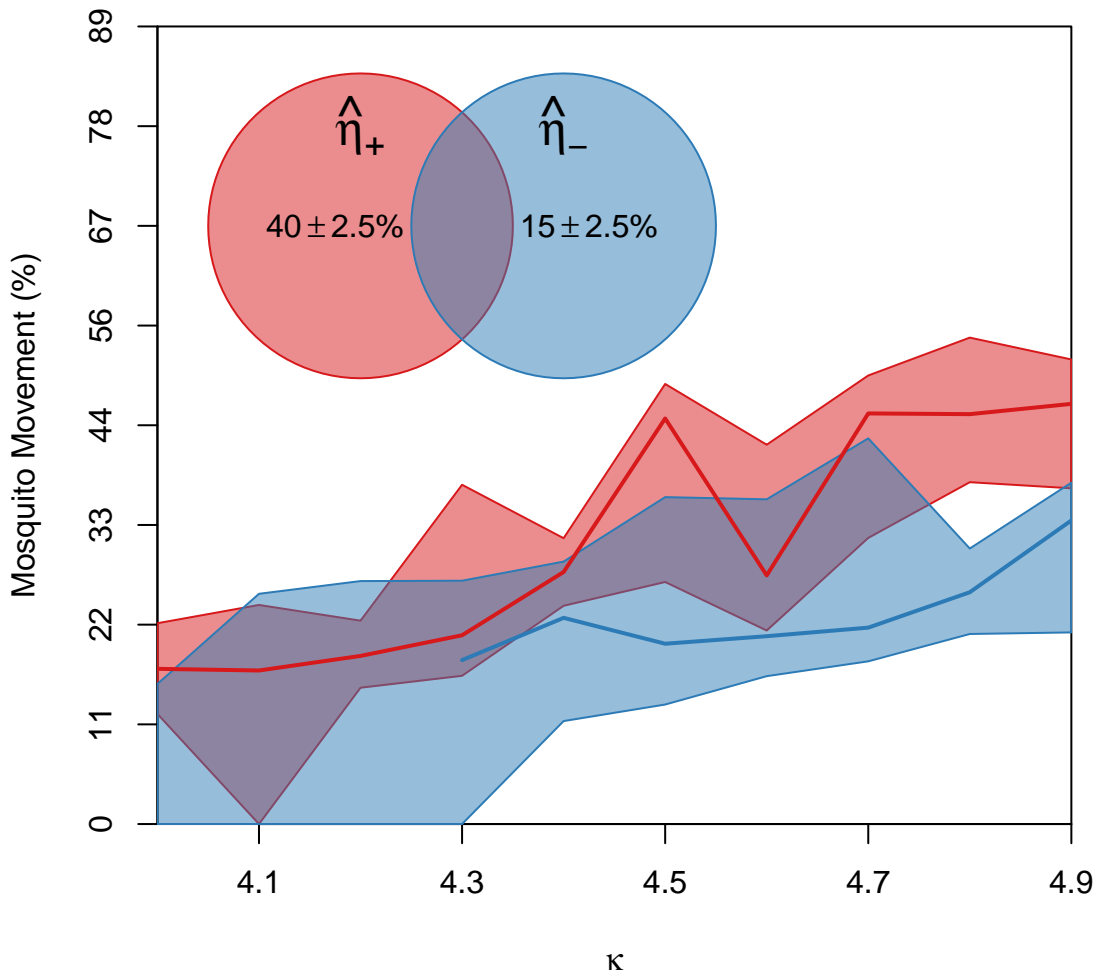

Supplement: NIHMS555593-supplement-7.pdf [file NIHMS555593-supplement-7.pdf]

K

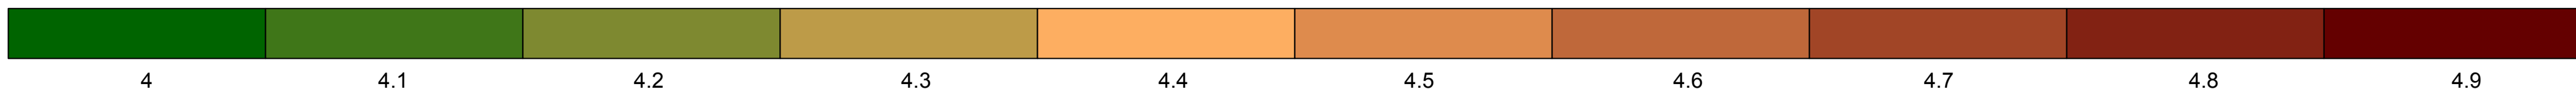

A.

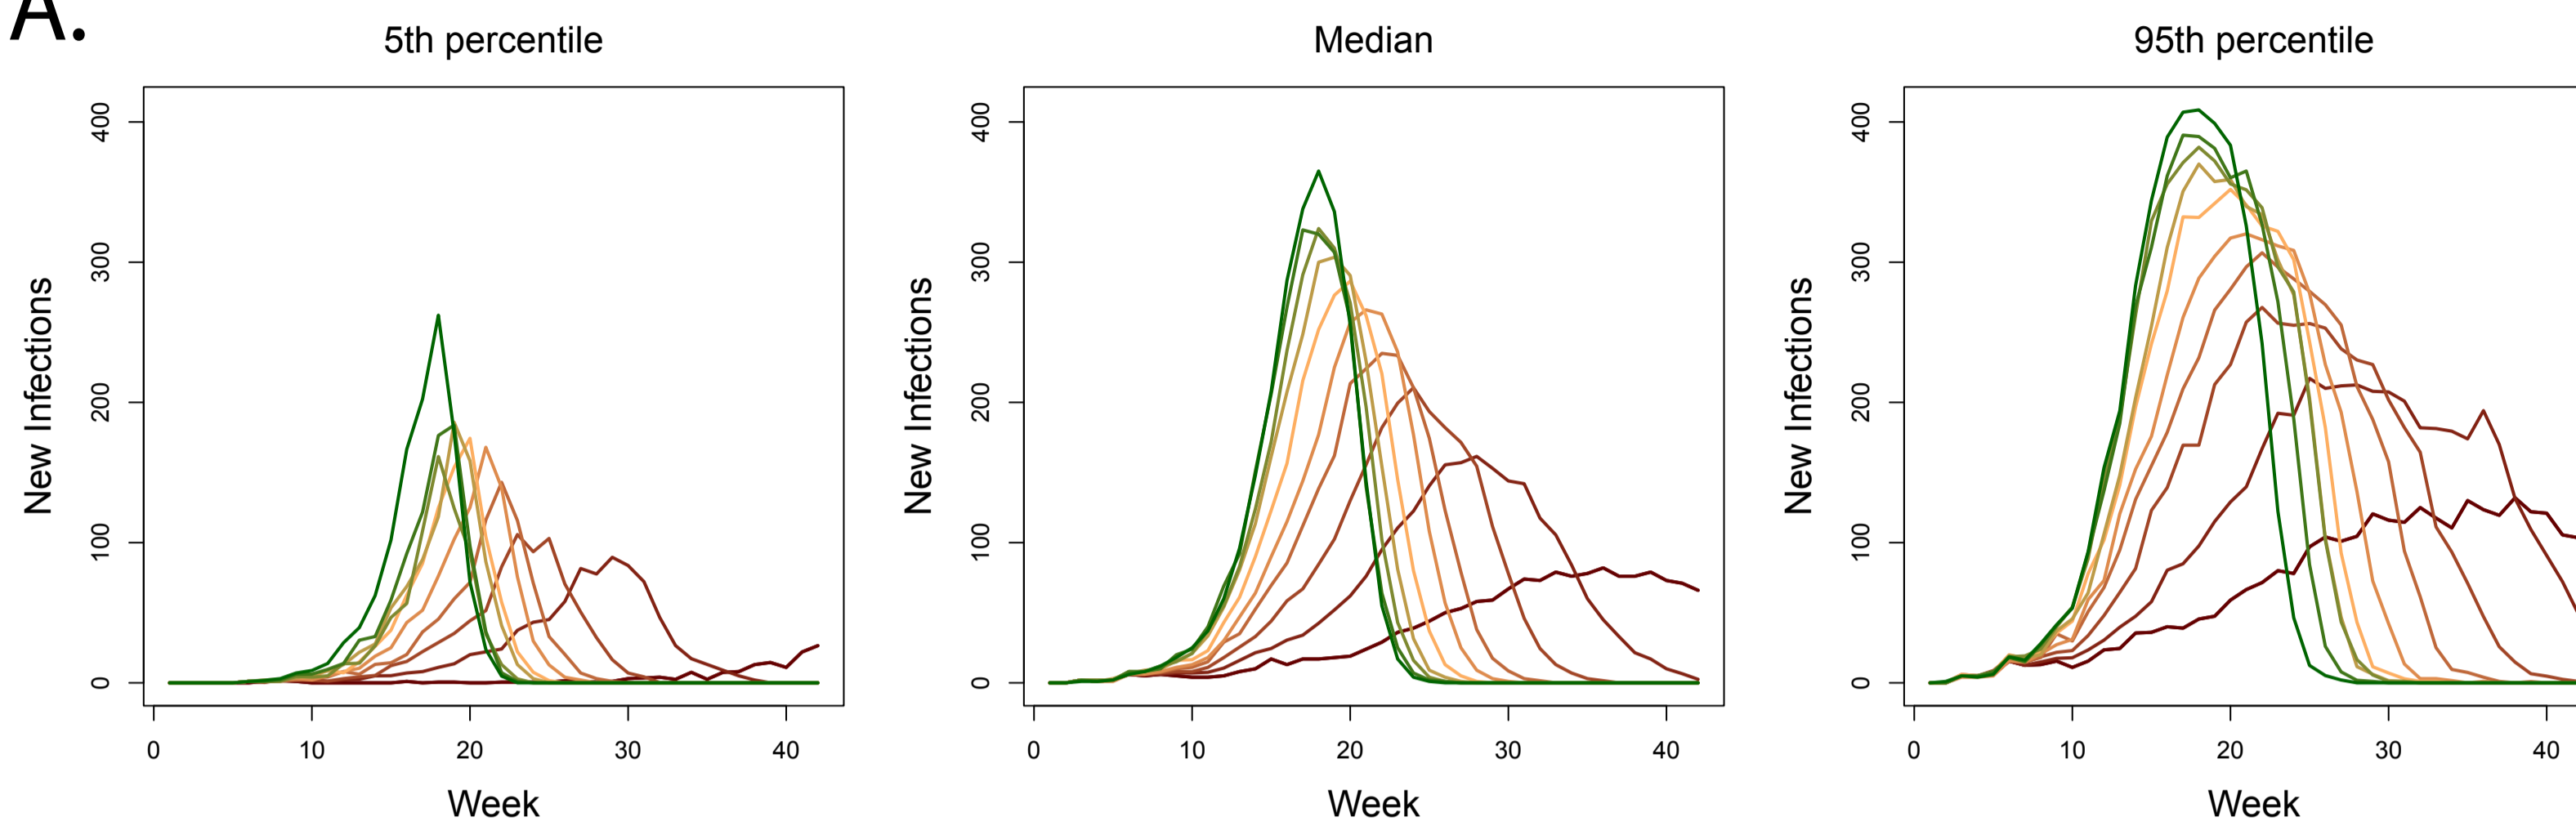

B.

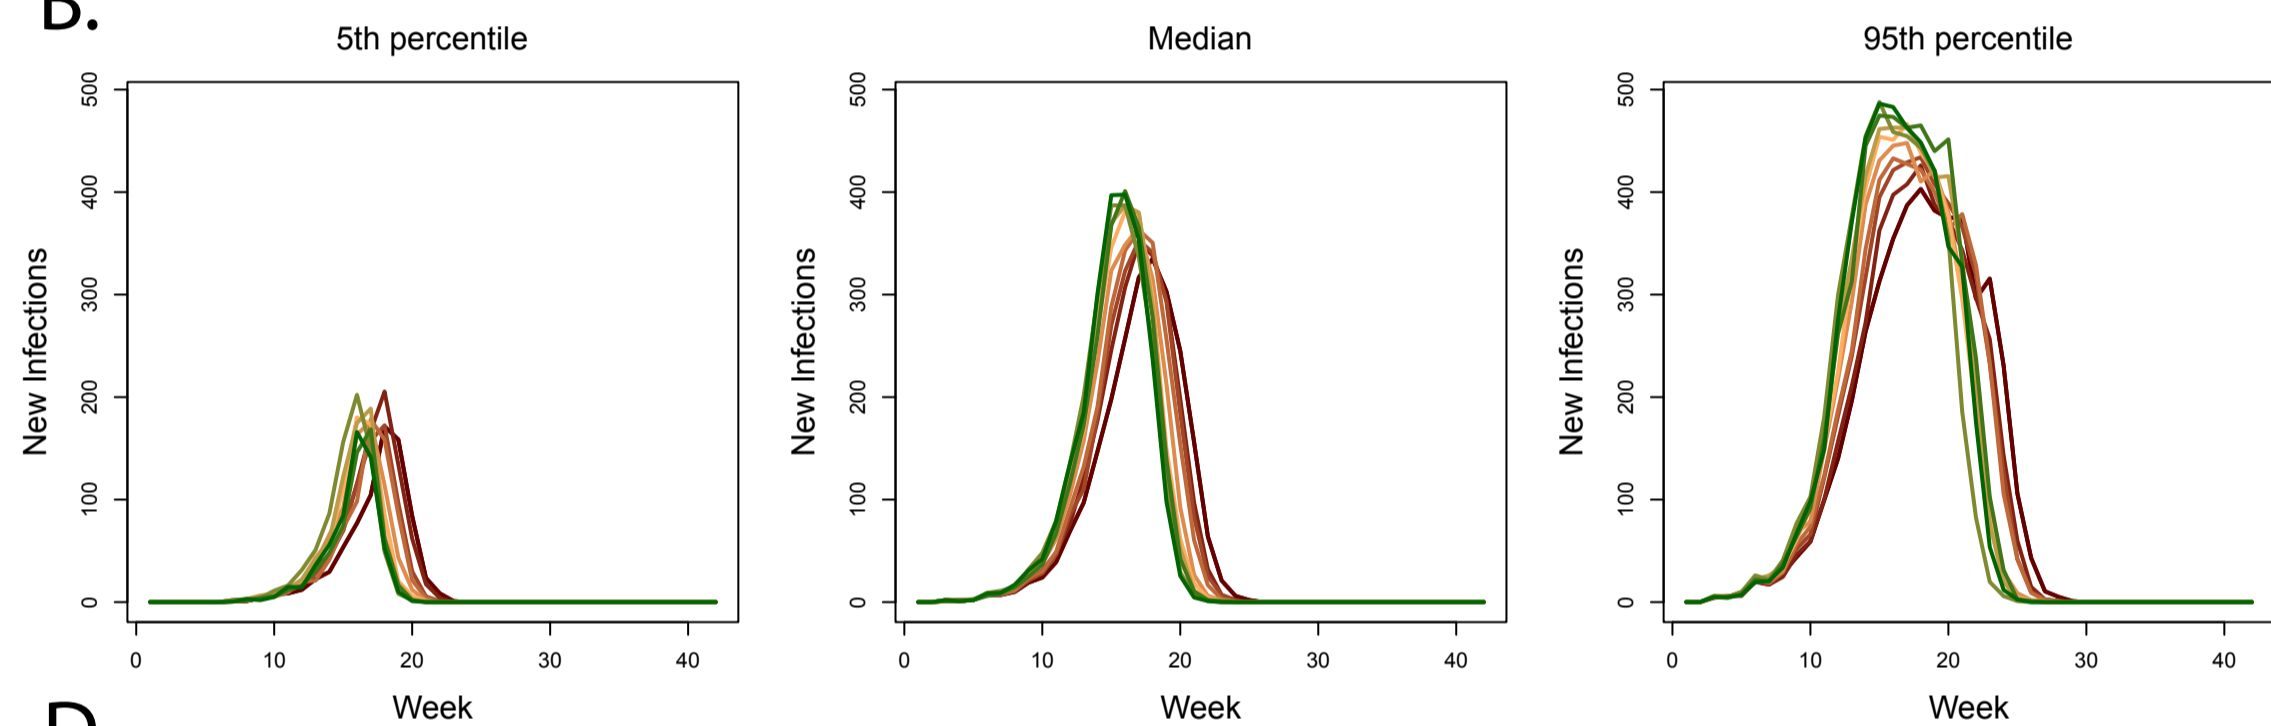

D.

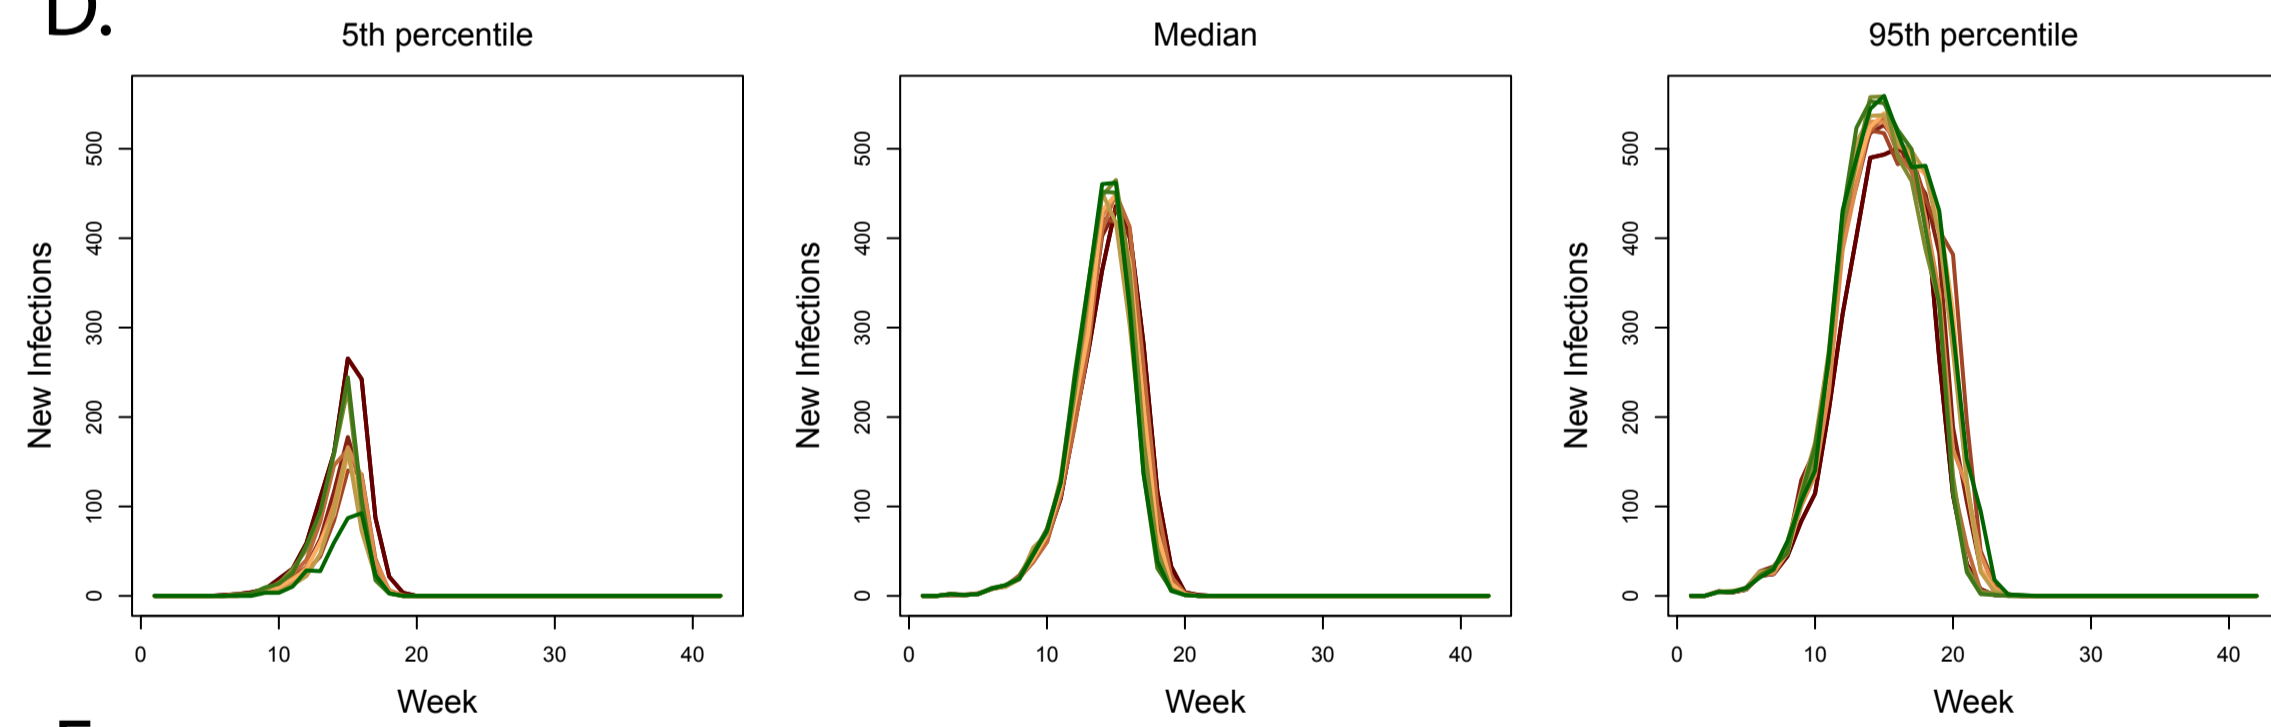

F.

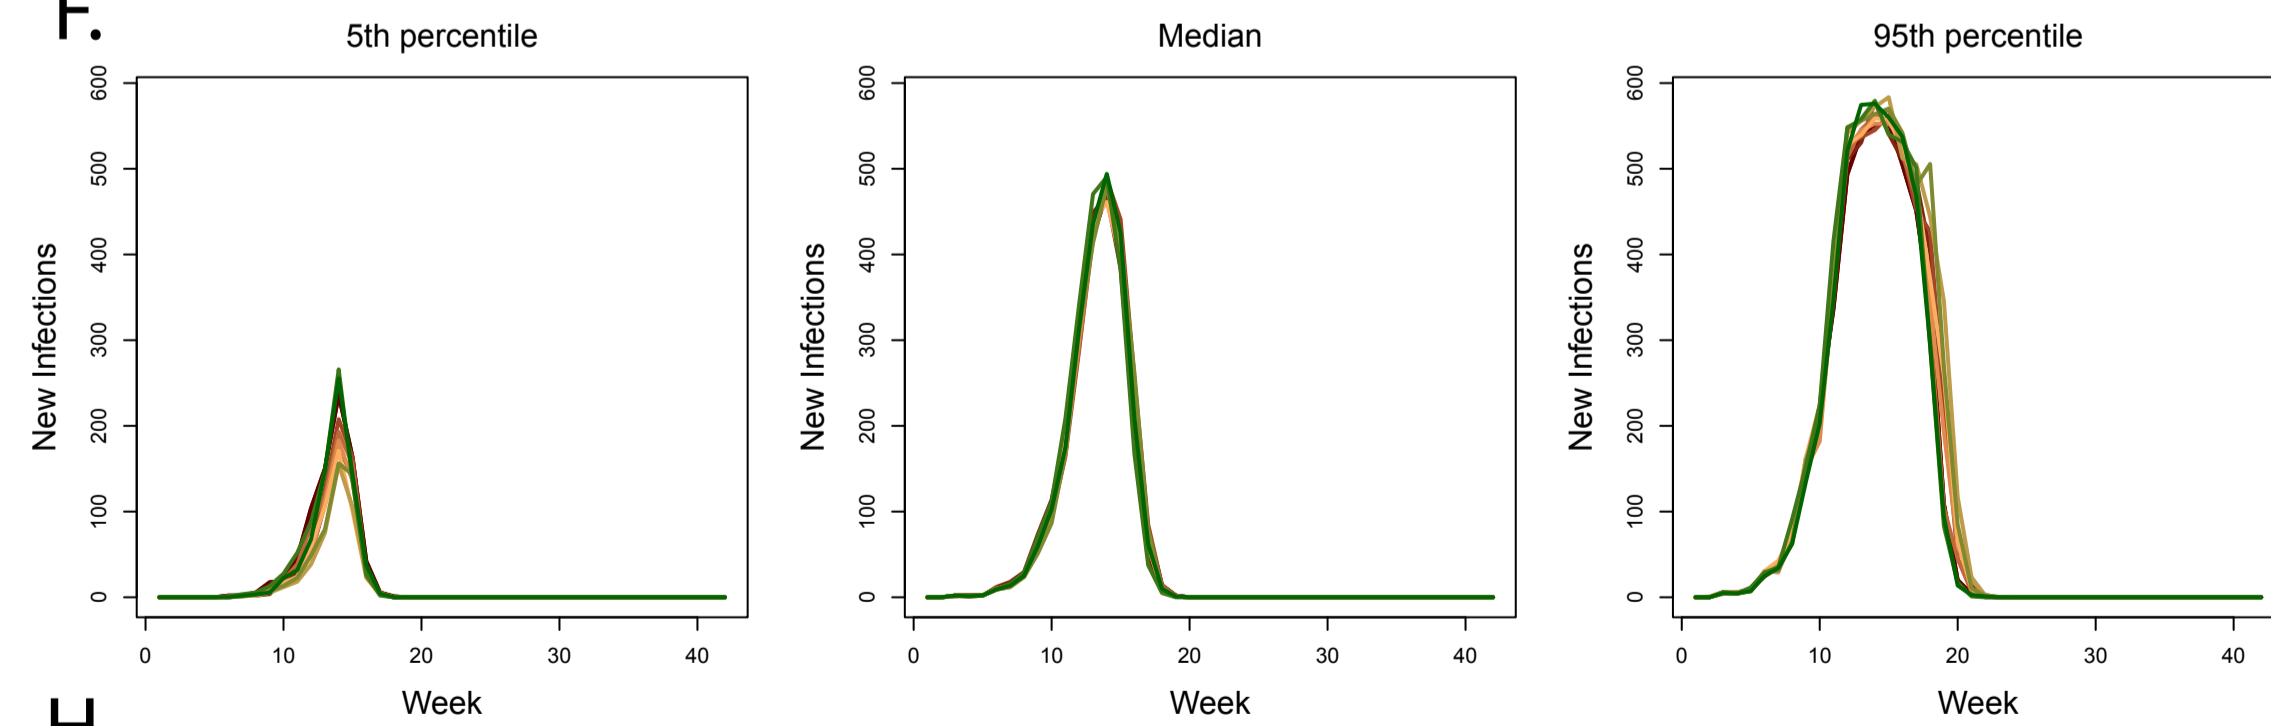

H.

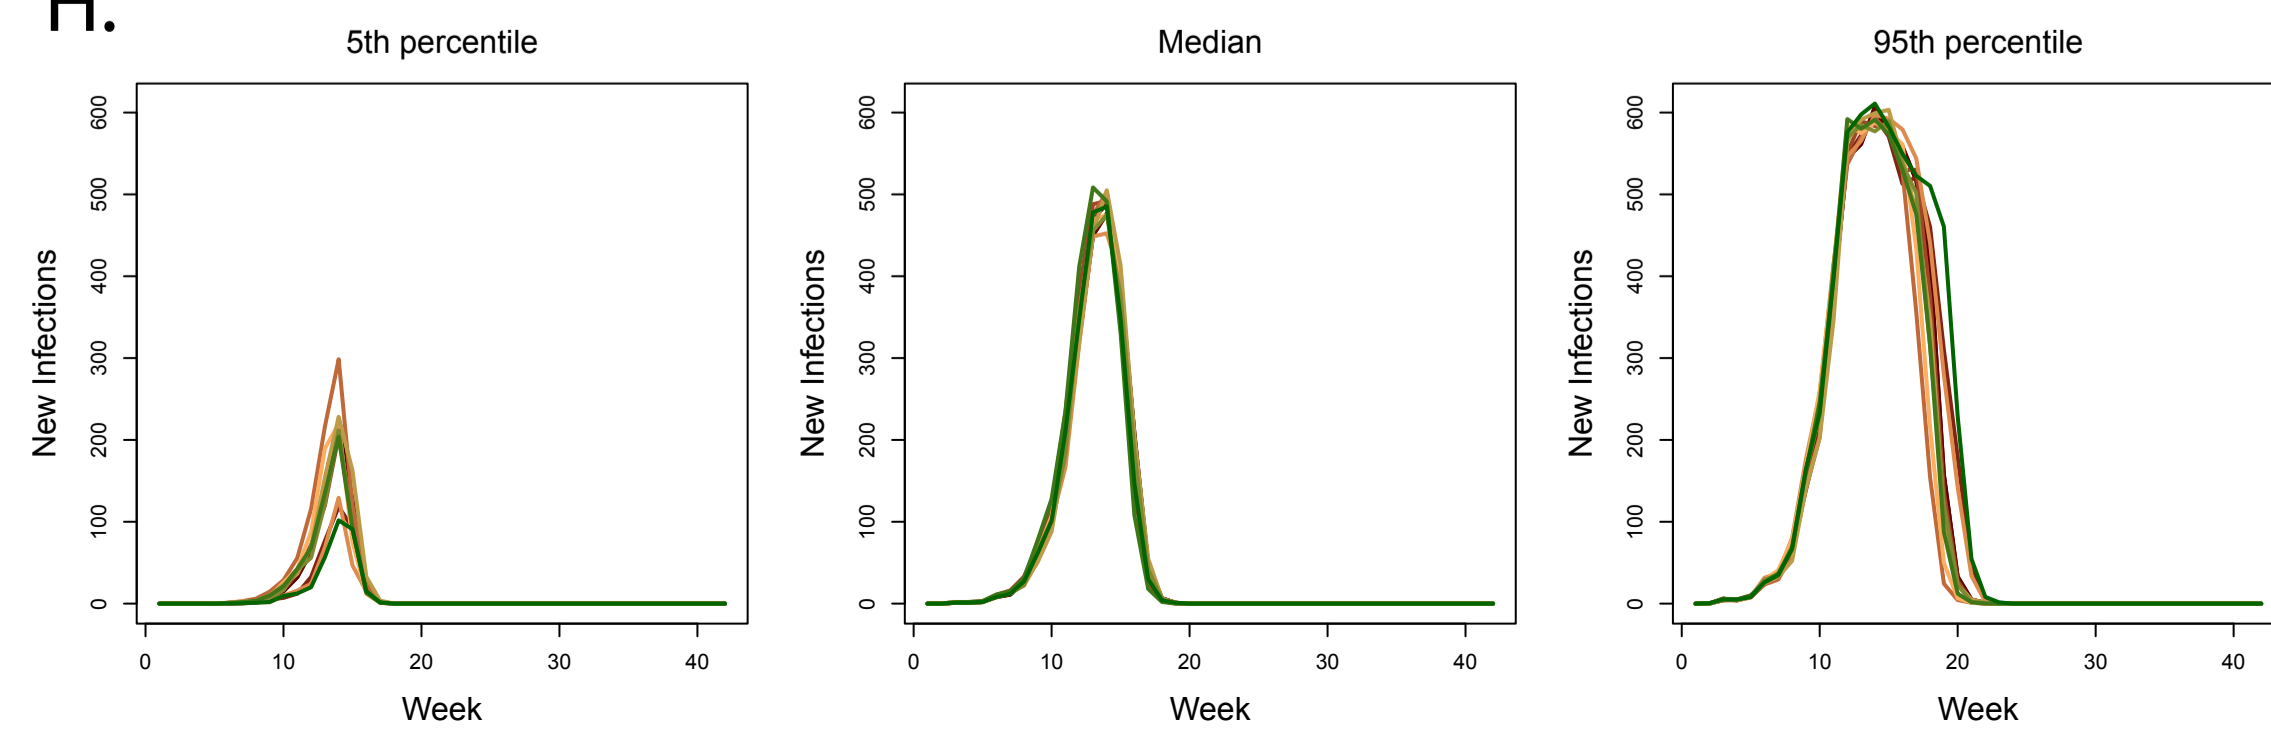

C.

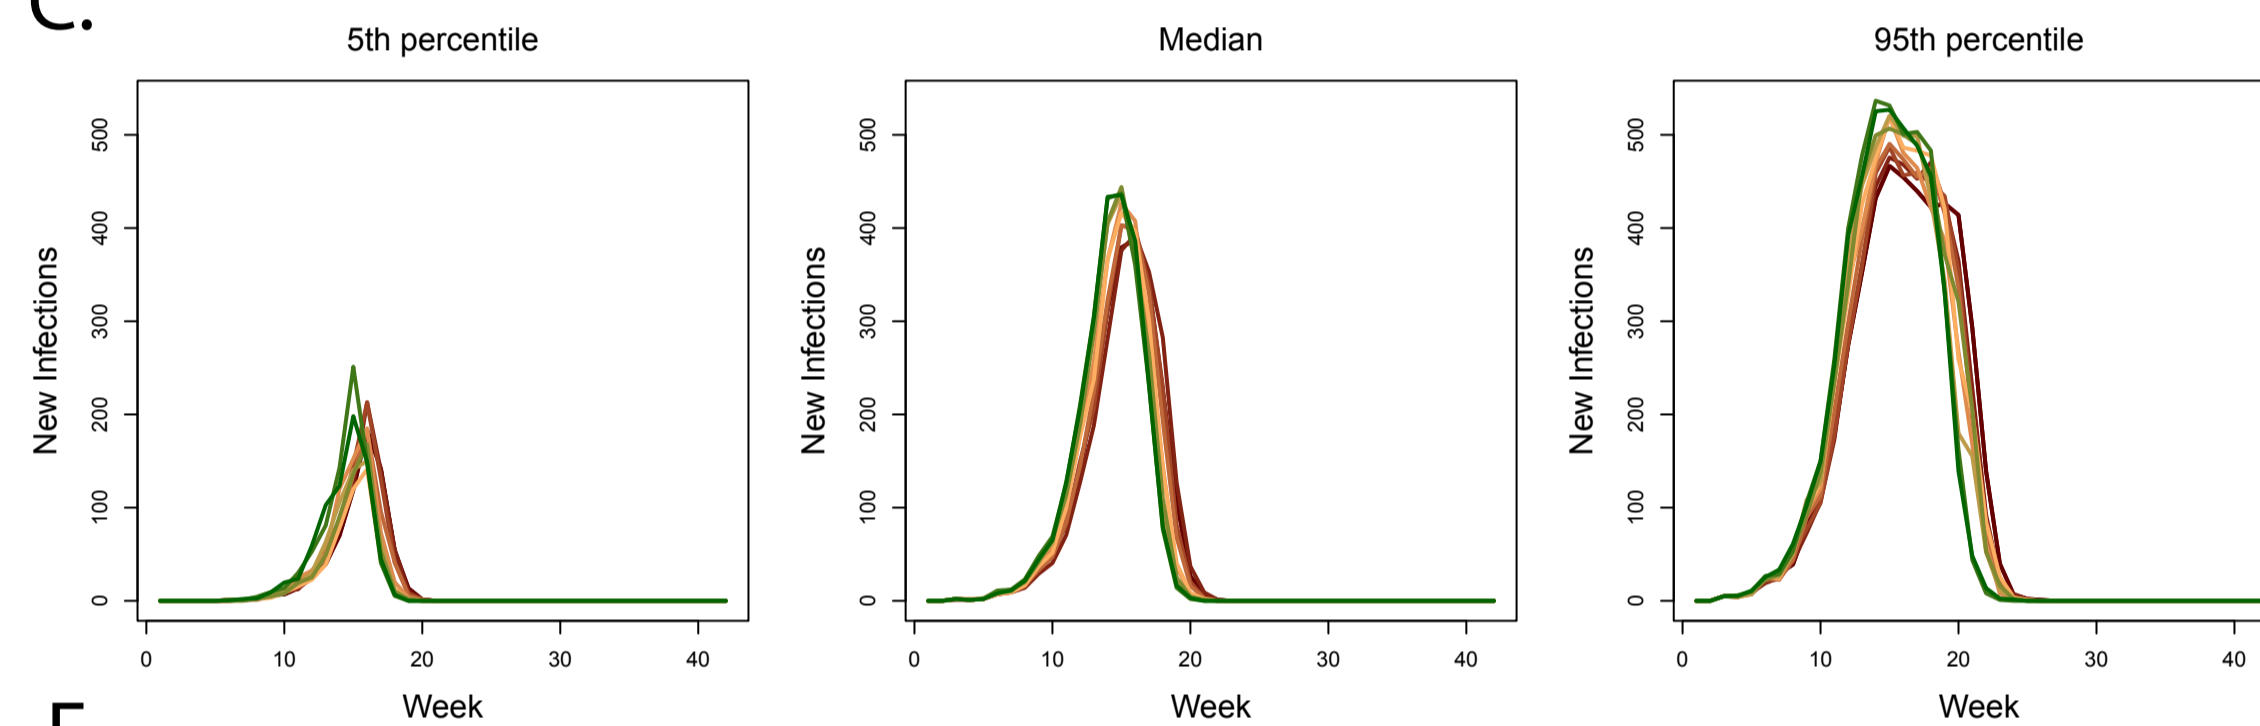

E.

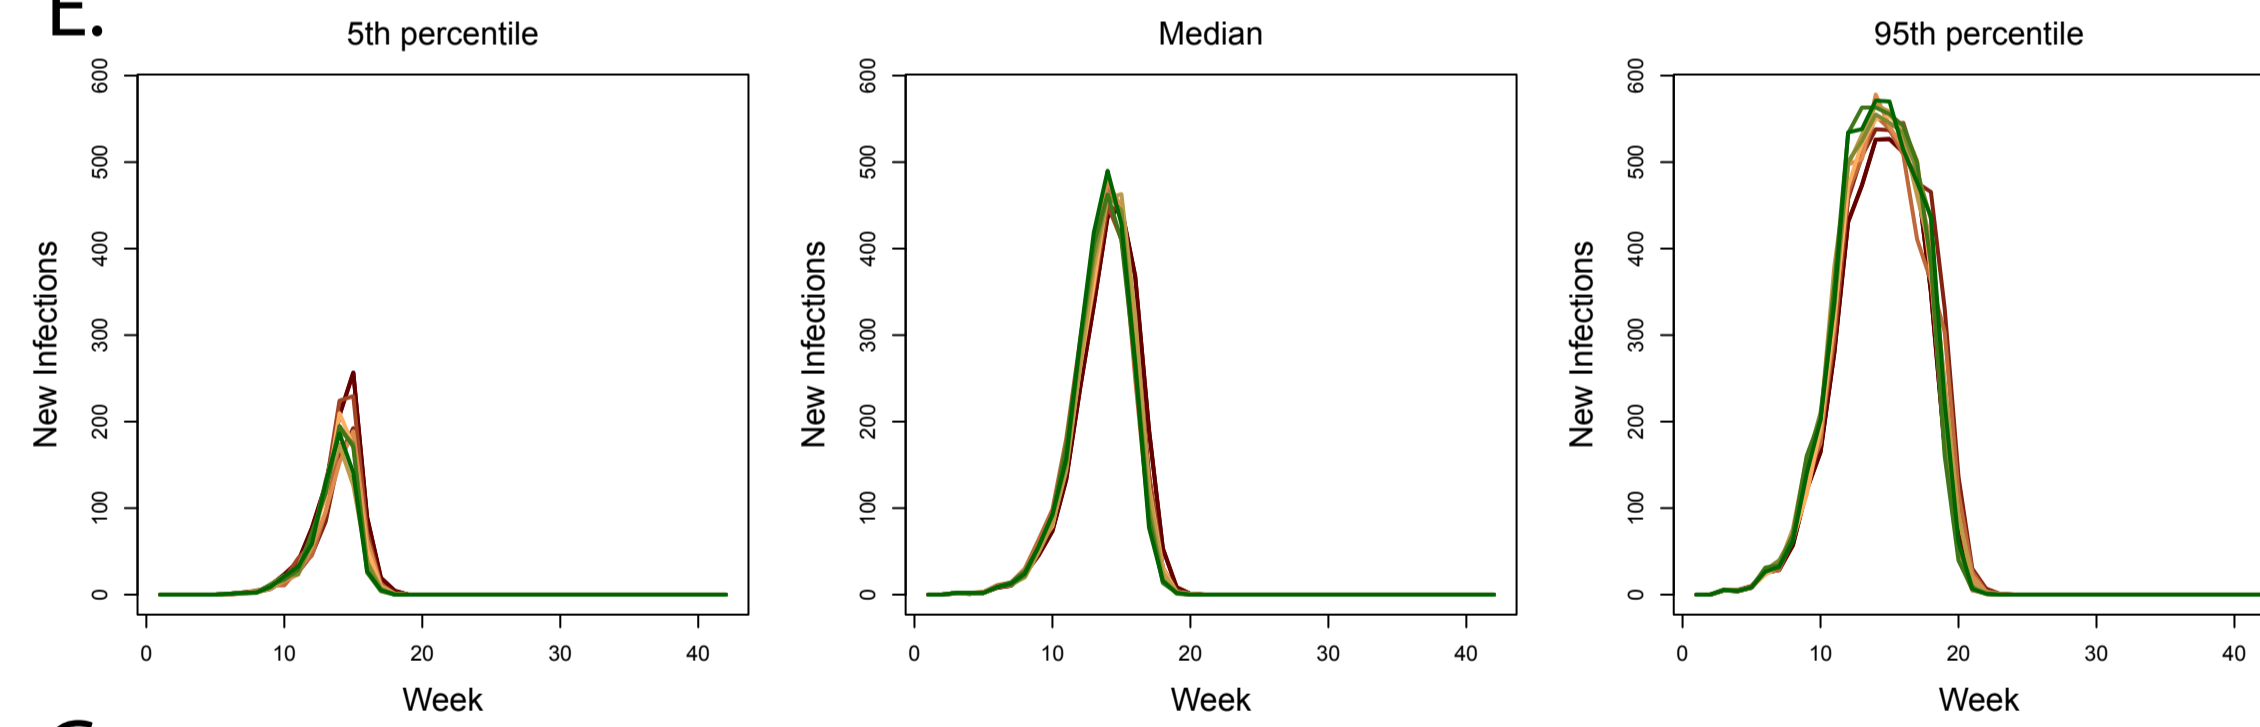

G.

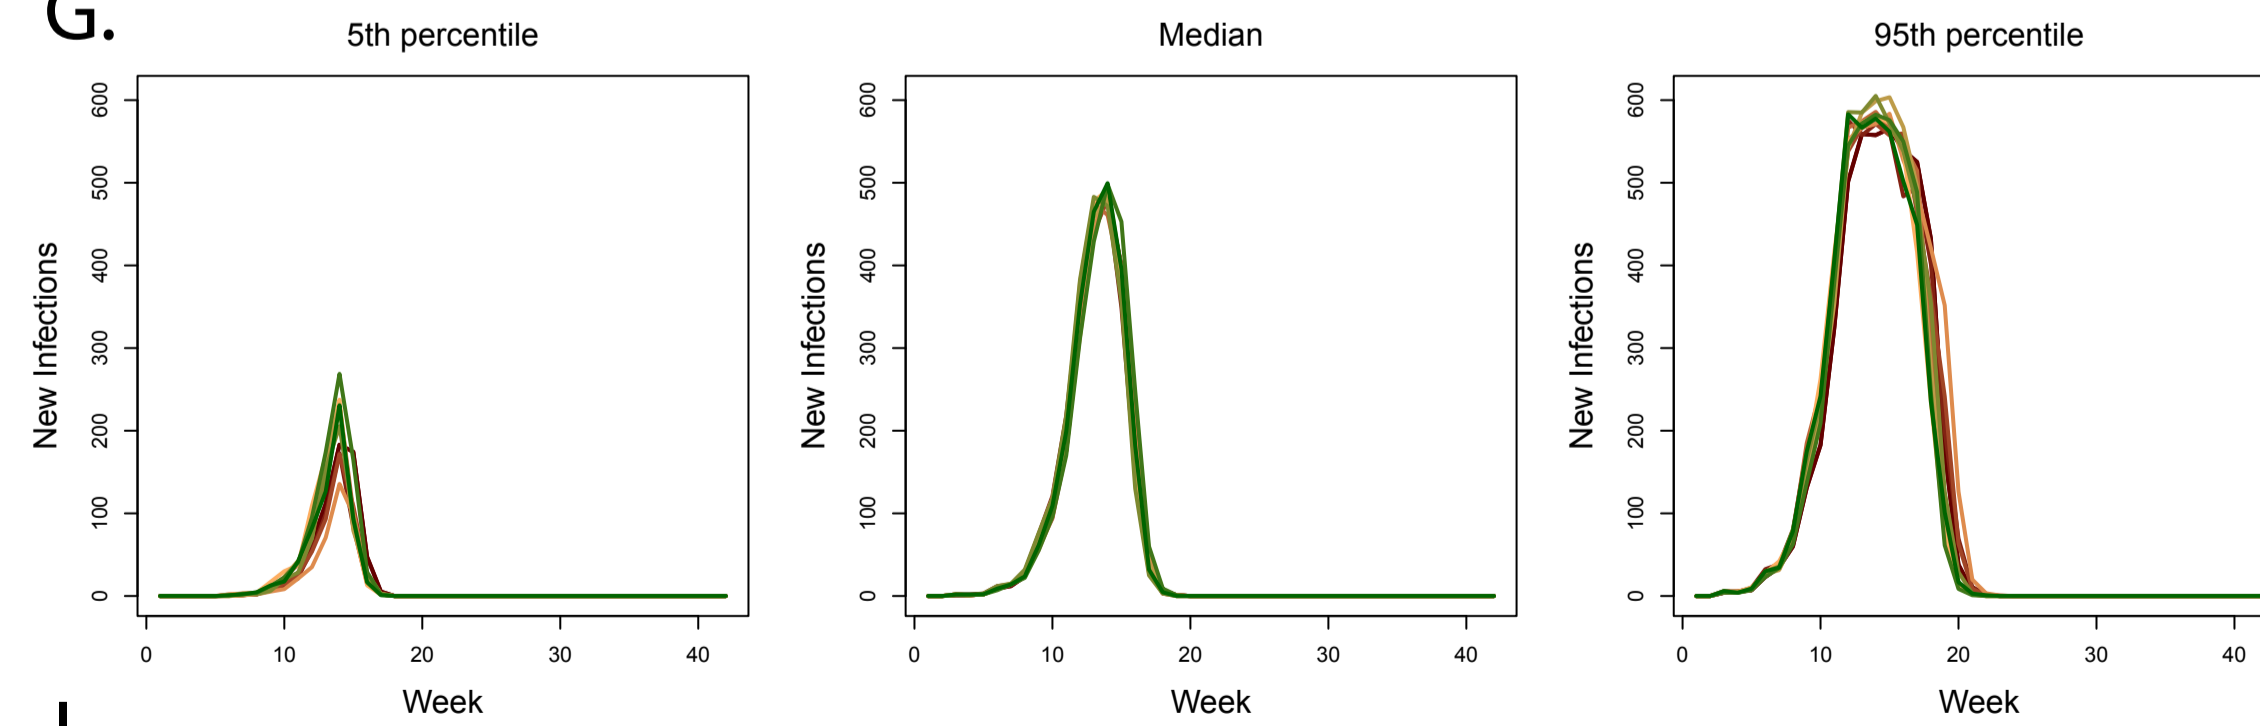

I.

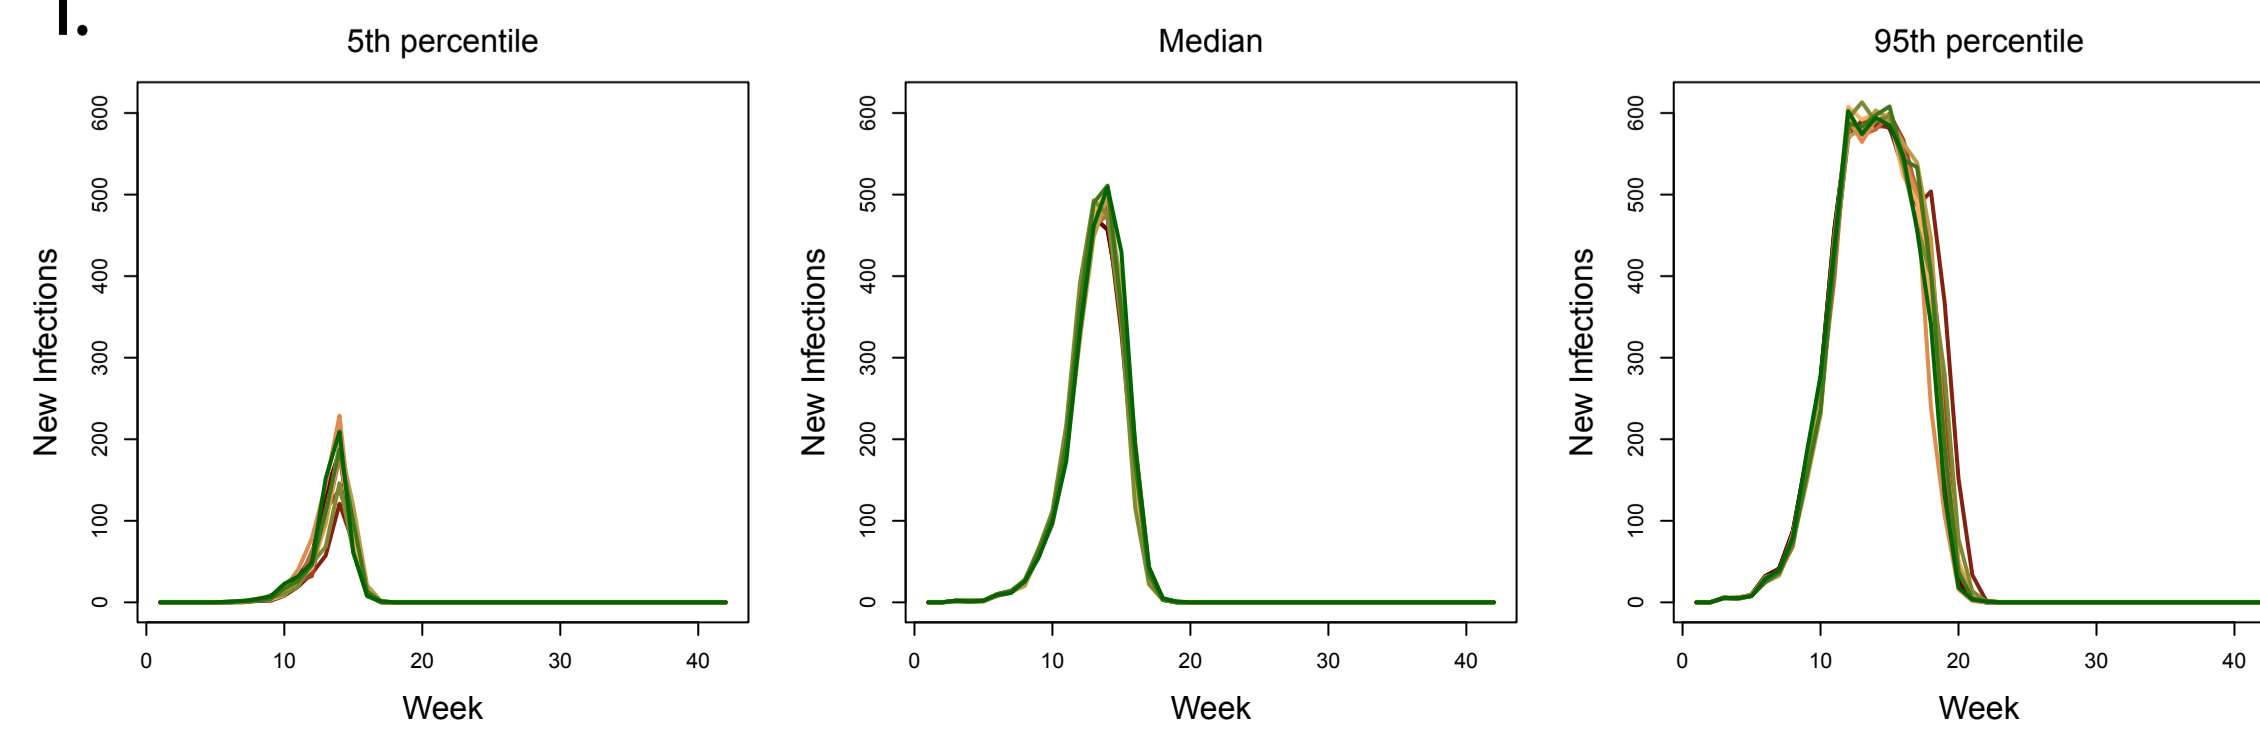

Supplement: NIHMS555593-supplement-8.pdf [file NIHMS555593-supplement-8.pdf]

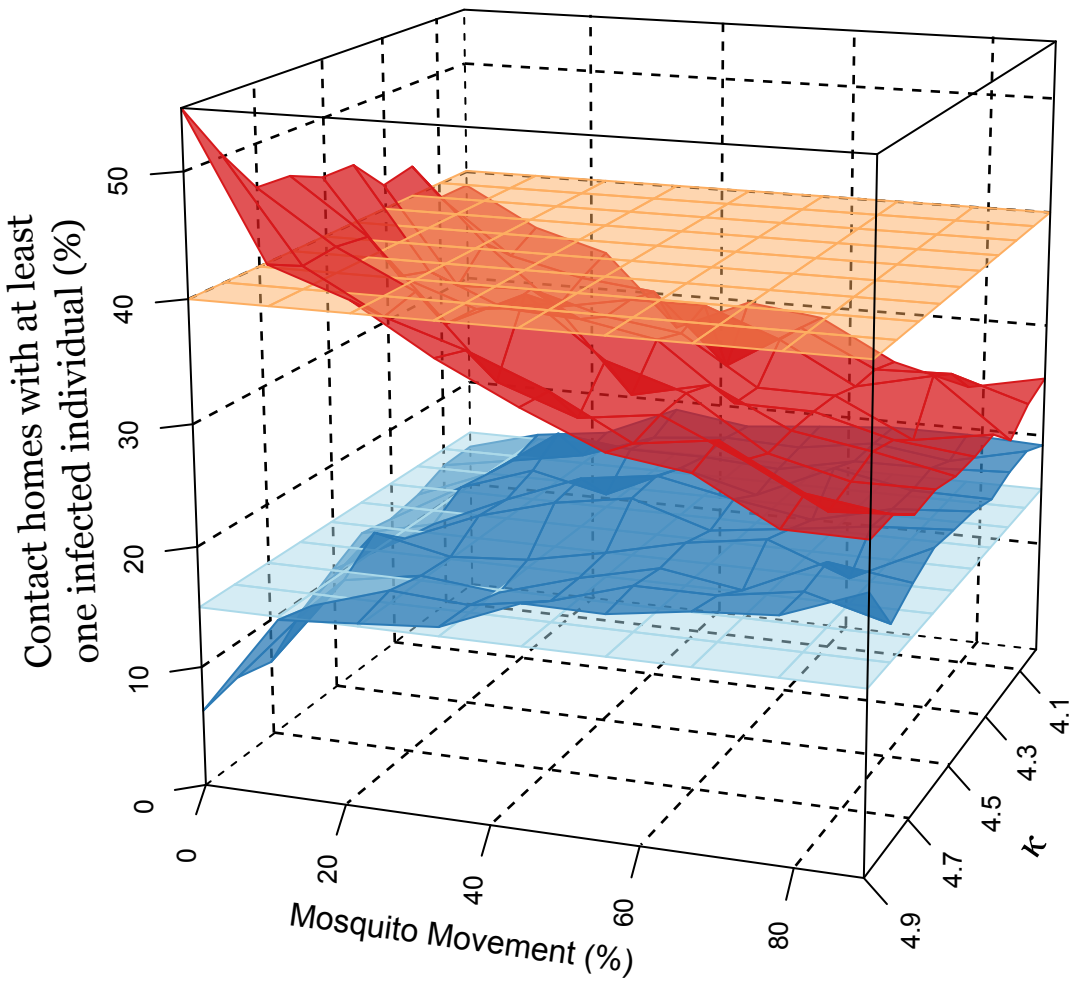

Supplement: NIHMS555593-supplement-9.pdf [file NIHMS555593-supplement-9.pdf]
